1                   **Label-free lymphocytes reconstitution using side scatter for**  
2                                           **optimal T cell manufacturing**

3  
4           **Tongjin Wu<sup>1</sup>, Yen Hoon Luah<sup>1</sup>, Yongqiang Luo<sup>1</sup>, Howard John Womersley<sup>1</sup>,**  
5                                           **Lih Feng Cheow<sup>1,2,\*</sup>**

6  
7           <sup>1</sup>Department of Biomedical Engineering, Faculty of Engineering, National University  
8           of Singapore, Singapore 117583, Singapore.

9           <sup>2</sup>Institute for Health Innovation and Technology, National University of Singapore,  
10          Singapore 117599, Singapore.

11          \* Correspondence: [lihfeng.cheow@nus.edu.sg](mailto:lihfeng.cheow@nus.edu.sg)

12

13

14

15

16

17

18

19

20

21

22

## 23 SUMMARY

24 Lymphocyte biology research commonly involves purification of lymphocyte  
25 subpopulations by fluorescence-activated cell sorting (FACS) or immunomagnetic  
26 separation (IMS), both of which typically rely on antibody labeling of validated cell  
27 markers. Methods enabling label-free segregation of lymphocyte subpopulations  
28 would be invaluable with regard to less-perturbation, simplicity and cost-effectiveness.  
29 Here, we introduce TRuST, a label-free approach for T cell reconstitution using side-  
30 scatter (SSC). TRuST-sorted SSC<sup>low</sup> cells enrich for CD4<sup>+</sup> T and naïve T cells, while  
31 SSC<sup>high</sup> cells enrich for CD8<sup>+</sup> T, NK and differentiated T cells. Enrichment purity can be  
32 improved by computational gate design. SSC<sup>low</sup> cells have superior expansion capacity  
33 and generate more central memory precursors with naïve-resembling cytokine  
34 responses. Moreover, we find that both T cell differentiation status and CD4/CD8 T  
35 ratio in the starting cellular material are critical attributes predicting T cell product  
36 quality and quantity. TRuST presents an effective and reliable technique for label-free  
37 lymphocytes selection and reconstitution.

38

39 **Keywords:** flow cytometry; side scatter; antibody-free; label-free; cell type purification;  
40 T cell reconstitution; naïve T cell enrichment; ratio of CD4/CD8 T; T cell manufacturing

41

## 42 INTRODUCTION

43 Lymphocytes, mainly including T cells, natural killer (NK) cells and B cells, play an  
44 indispensable part in human immune system. Use of purified lymphocyte subsets for

45 lymphocyte biology research is critical to dissect the functional heterogeneity of  
46 lymphocyte subpopulations. Fluorescence-activated cell sorting (FACS) (Cossarizza  
47 et al., 2019) and immunomagnetic separation (IMS) (Plouffe et al., 2015) are methods  
48 of choice to obtain purified cell types of interest, relying on the labeling with specific  
49 antibody conjugates such as fluorochrome-modified antibodies and magnetic beads-  
50 coupled antibodies. Despite powerful of these technologies, there still exist some  
51 limitations.

52

53 One of the most common concerns is antibody labeling-caused functional change of  
54 immune cells which are relatively sensitive to antibody-mediated activation/inhibition  
55 (Attanasio and Wherry, 2016; Chen and Flies, 2013), interfering with downstream cell  
56 biology studies. Thus, careful selection of validated antibody clones and strict  
57 experimental controls are generally required in experimental design. In addition, it is  
58 extremely difficult to release the bound fluorescent antibodies on cell surface if cell  
59 viability was to be maintained. These sorted cells are not suitable for re-labeling with  
60 the same fluorochrome conjugates due to occupancy of fluorescence channels,  
61 resulting in less flexibility in the choice of fluorescent antibodies for multiparametric  
62 flow cytometry experiments. Also, these cells might not be feasible for downstream cell  
63 culture assays if the occupied target markers were necessary to be re-engaged for cell  
64 functionality. For example, the labeling of CD3 receptor for T cells enrichment by FACS  
65 might affect the activation/expansion of T cells when CD3/CD28 engagement is  
66 required for cell stimulation (Roddie et al., 2019). Superparamagnetic particles-

67 antibody coupling technique combined with magnetic isolation is shown to be capable  
68 of minimizing the effects introduced by fluorescent antibodies occupancy thanks to its  
69 effective separation with only unsaturated concentration of bead-antibody conjugates  
70 (Grutzkau and Radbruch, 2010; Plouffe et al., 2015). However, concerns arising from  
71 the use of nanosized magnetic beads include internalization of magnetic beads and  
72 preservation of magnetic properties for an extended period in cells that are subjected  
73 to limited proliferation, which calls for caution when repetitive positive isolation steps  
74 after in vitro culture are required (Laghmouchi et al., 2020; Teeman et al., 2019). More  
75 recently, Miltenyi Biotec has introduced the REAlease Fluorochrome Technology that  
76 relies on engineered antibody fragments with low epitope binding affinities which  
77 allows stained antibodies to be released. Design of releasable superparamagnetic  
78 beads-antibody conjugate could be of interest to improve magnetism-based cell  
79 separation. Nevertheless, the time and cost for sample processing are inevitably  
80 increased and concerns relating to cell labeling-caused alteration on downstream  
81 assays still exist. Therefore, with regard to less perturbation on target cells and  
82 enhanced flexibility in sample processing, approaches that enable label-free cell type  
83 separation from mixed lymphocytes would be highly attractive and great useful in  
84 lymphocyte biology studies.

85

86 Selection of specific T cell types has also seen its utility in the field of cellular  
87 immunotherapy. Insight into attributes of therapeutic potency based on T cell receptor  
88 (TCR)-redirected T cells such as chimeric antigen receptor (CAR) T cells and TCR-T

89 cells is a central goal of T cell immunotherapy (Majzner and Mackall, 2019; Rafiq et al.,  
90 2020). The quality of T cell products generated ex vivo has been recognized as a  
91 critical factor affecting immunotherapy efficacy (Deng et al., 2020; Finney et al., 2019;  
92 Fraietta et al., 2018; Roddie et al., 2019). Unfractionated peripheral blood mononuclear  
93 cell (PBMC) concentrates are commonly used for T cell production, leading to  
94 uncontrollable batch-to-batch variation. Separate expansion of CD4<sup>+</sup> T and CD8<sup>+</sup> T  
95 cells pre-enriched by immunomagnetic selection enhances product consistency and  
96 manufacturing feasibility (Gardner et al., 2017; Shah et al., 2020; Sommermeyer et al.,  
97 2016; Turtle et al., 2016). Of note, CD4<sup>+</sup> T cells help is critical for shaping the adaptive  
98 immunity of CD8<sup>+</sup> T cells in vivo (Nakanishi et al., 2009; Sun et al., 2004) and improves  
99 CD8<sup>+</sup> T cells tumor-eradicating potency (Alspach et al., 2019; Arina et al., 2017;  
100 Nakanishi et al., 2009; Schietinger et al., 2010). However, the notion, whether CD4<sup>+</sup> T  
101 and CD8<sup>+</sup> T cells should be expanded separately or together at designed ratio in vitro,  
102 especially in the scenario where external antigens are absent, remains to be clarified.  
103 In addition, adoptive transfer of T cell products derived from less-differentiated T cell  
104 subsets shows better curative potential than their more-differentiated counterparts as  
105 observed in both animal works (Berger et al., 2008; Gattinoni et al., 2011; Hinrichs et  
106 al., 2009; Hinrichs et al., 2011; Wang et al., 2011) and clinical studies (Finney et al.,  
107 2019; Fraietta et al., 2018; Xu et al., 2014). These studies suggest that preselecting  
108 specific T cell subtypes would be very useful for cell manufacturing aiming to improve  
109 immunotherapy efficacy. Undoubtedly, increased demand for therapeutic T cell product  
110 calls for cost-effectiveness and manufacturing simplicity. Methods enabling the

111 segregation of ideal cell subsets without the use of costly antibodies would be  
112 invaluable by omitting the requirement of large amount of clinical grade  
113 immunomagnetic antibodies and complicated downstream processing workflows.

114

115 There has been an increasing number of thought-provoking studies on label-free  
116 lymphocytes identification. Light scattering, a parameter commonly used in flow  
117 cytometry, is capable of measuring cell size via forward scatter (FSC) and cellular  
118 granularity by side scatter (SSC) (Cossarizza et al., 2019). Light scattering has already  
119 seen its versatile applications in the screening of lymphocyte samples to distinguish  
120 healthy and disease patients such as B-cell chronic lymphocytic leukemia (B-CLL)  
121 (Terstappen et al., 1988), cutaneous T-cell lymphoma (Clark et al., 2011) and chronic  
122 hepatitis B or C infection (Ruban et al., 2010). The principle underlining light  
123 scattering related disease diagnostics could be that, in general, CD8<sup>+</sup> T cells has higher  
124 SSC than CD4<sup>+</sup> T cells while B cells tend to locate between the resting and activated  
125 CD8<sup>+</sup> T cells populations (Terstappen et al., 1986a; Terstappen et al., 1986b). Of note,  
126 most of the reports have not clearly clarified the potential confounding effects resulting  
127 from cell size on SSC pattern given that unhealthy or activated lymphocytes with  
128 altered size (higher FSC) are likely to change their SSC profile also (Clark et al., 2011;  
129 Loudon et al., 1988; Terstappen et al., 1988). Thus, the question arising is whether  
130 SSC distribution is enough to tell the differences of lymphocyte cell types that have  
131 indistinguishable cell size, for example, healthy lymphocyte subpopulations under  
132 resting status. Moreover, to date, a closer look at the subtle scattering distribution of T

133 cell differentiation lineages (e.g. naïve/memory T cells) has been neglected.

134 Memory/effector T cells are observed to have more granules than their naïve

135 counterparts under transmission electron microscope (Dimeloe et al., 2016). These

136 findings imply that cell general biophysical attributes (e.g. light scattering) may be

137 further exploited to select for lymphocyte subpopulations with particular functionality,

138 such as for immunotherapy.

139

140 Taken together, these inadequacies highlight the need for new methods capable of

141 selecting lymphocyte subpopulations in a label-free manner by relying on general cell

142 biophysical properties. To achieve this, we initially had an in-depth analysis of the light

143 scattering profile (FSC/SSC) of resting human lymphocyte subsets, including NK cells,

144 B cells, total CD4<sup>+</sup> T cells, total CD8<sup>+</sup> T cells, as well as CD4<sup>+</sup> or CD8<sup>+</sup> naïve/memory

145 T cell subsets. We found that SSC instead of FSC is a robust biophysical property to

146 distinguish lymphocyte subsets. Generally, lymphocytes with “helper” function such as

147 CD4<sup>+</sup> T cells and B cells have a lower SSC than that with “cytotoxic” function such as

148 CD8<sup>+</sup> T cells and NK cells. Interestingly, this discrepancy in SSC profile is even more

149 apparent among T cell differentiation lineages regardless of CD4<sup>+</sup> or CD8<sup>+</sup> T cell type.

150 Younger T cells such as naïve T cells and memory precursors have a significantly lower

151 SSC than their more-differentiated counterparts including central memory T cells,

152 effector memory T cells and terminally effector memory T cells. Inspired by these

153 findings, we developed TRuST, a label-free method for T cell reconstitution using side

154 scatter. TRuST-relied T cell segregation is based on two gating strategies. One is

155 computational gate search aimed to maximize the purity of target cell type of interest.  
156 The other is manual gate selection which is easier and more flexible in reconstituting  
157 lymphocyte composition instead of focusing on single cell subset. We further  
158 demonstrated that reconstituted SSC<sup>low</sup> cells that are enriched for CD4<sup>+</sup> T and naïve T  
159 cells have superior expansion capacity and produce more central memory precursors.  
160 Finally, using the TRuST-based T cell segregation, we were able to find that both less-  
161 differentiated T cell subpopulations and high CD4<sup>+</sup> T to CD8<sup>+</sup> T ratio in starting cellular  
162 material are critical attributes predicting T cell product quality and quantity. This study  
163 established TRuST as an effective and reliable technique for label-free lymphocytes  
164 selection and reconstitution, which would be useful for lymphocytes biology studies  
165 and T cell manufacturing for improved immunotherapy.

166

## 167 **RESULTS**

### 168 **TRuST development**

169 TRuST is a label-free approach for lymphocyte subpopulations selection and T cell  
170 reconstitution. The development of TRuST was inspired by the intrinsic side-scattering  
171 difference of lymphocyte subpopulations including CD4<sup>+</sup> T cells, CD8<sup>+</sup> T cells, NK cells,  
172 B cells, and main T cell differentiation lineages including naïve (T<sub>N</sub>, CD45RA<sup>high</sup>  
173 CCR7<sup>high</sup>), central memory (T<sub>CM</sub>, CD45RA<sup>dim/-</sup> CCR7<sup>low</sup>), effector memory (T<sub>EM</sub>,  
174 CD45RA<sup>dim/-</sup> CCR7<sup>-</sup>) and terminally differentiated effector (T<sub>EMRA</sub>, CD45RA<sup>high</sup> CCR7<sup>-</sup>)  
175 (**Figures 1A, S1A, and S1B**) (Bohler et al., 2007; Seder and Ahmed, 2003). Due to  
176 the heterogeneous SSC patterns of lymphocyte subpopulations, using the pre-stained



177 lymphocytes for each new sample, it is feasible to find the optimum gate that has the  
178 desired purity and yield for target cells of interest via GateID, a computational gate  
179 search algorithm for cell type purification (Baron et al., 2019) (**Figure 1B**). Alternatively,  
180 a series of manual gates can be set to determine the optimum gate for T cell  
181 reconstitution depending on the research aims (**Figure 1C**). The selected gate can be  
182 simply adopted and applied for the sorting of unstained lymphocytes (**Figure 1D**). For  
183 downstream cell culture assays such as T cell expansion for immunotherapy, the total  
184 lymphocytes can be directly sorted into  $SSC^{low}$  and  $SSC^{high}$  groups that consist of  
185 functionally distinct T cell subsets. The sorted cells are subjected to canonical  
186 expansion protocol using anti-CD3/CD28 microbeads plus interleukin-2 (IL-2) (**Figures**  
187 **1D and 1E**). This enables us to study how the initial cell composition affect T cell  
188 expansion dynamics, phenotypes formation, and functionality shaping in  
189 multifunctional cytokine expression (**Figures 1E and S1C**), and the attributes that  
190 contribute to the discrepancies of final T cell products (**Figure 1E**). Together, this work  
191 flow demonstrates the utility of TRuST for label-free lymphocyte selection and T cell  
192 constitution for downstream lymphocytes biology study.

193 (main text continued after Figure 1)

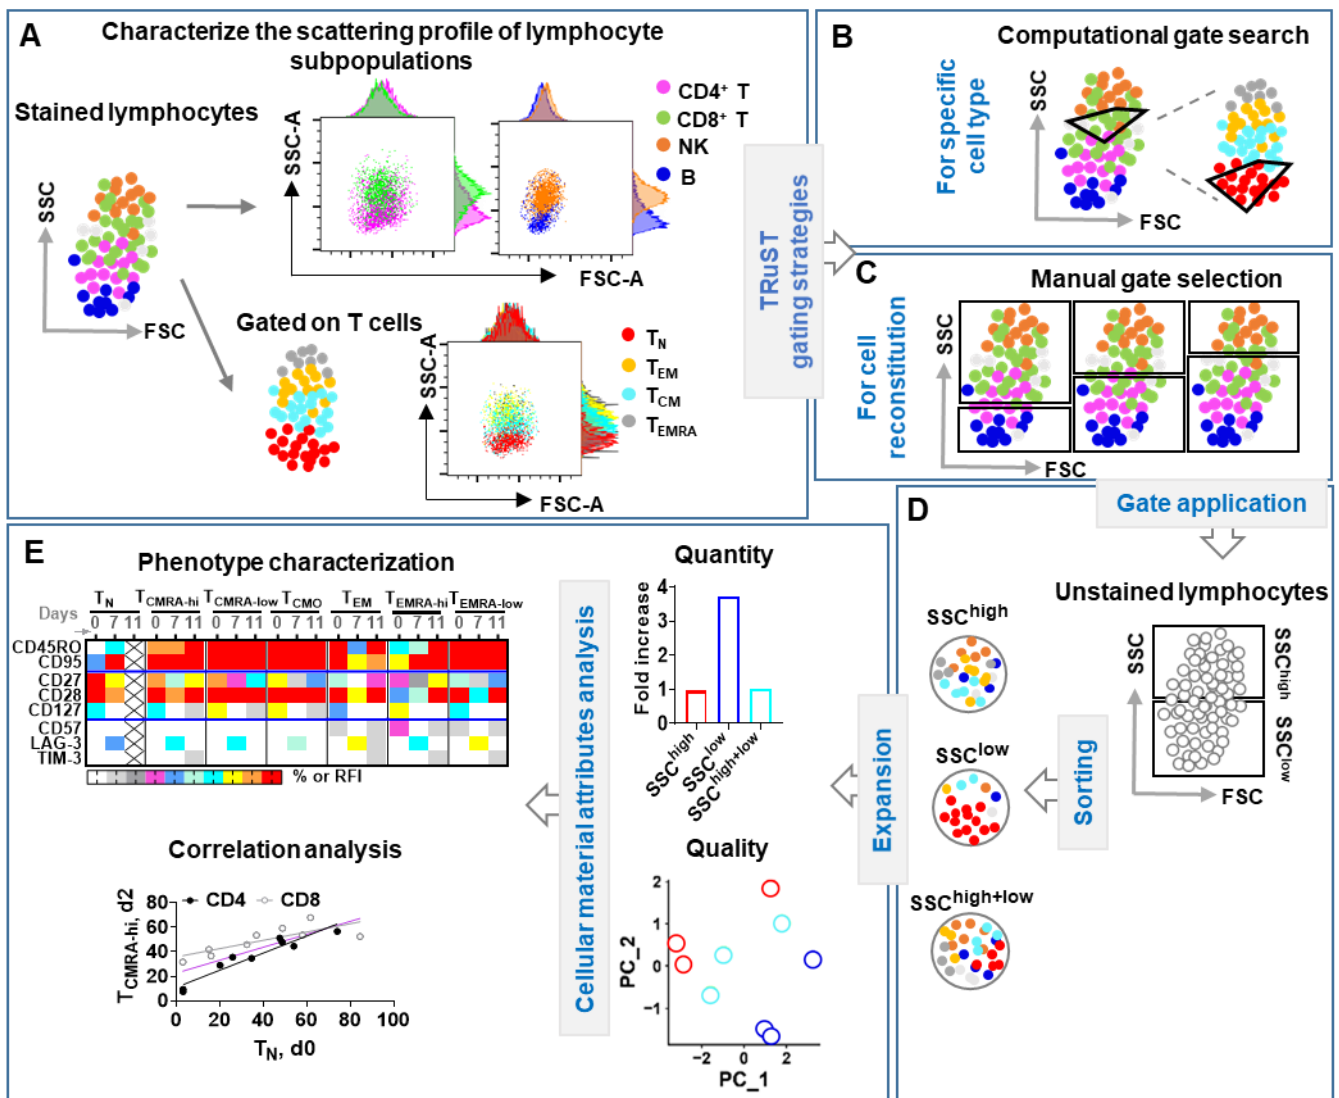

194 **Figure 1. TRuST: An effective approach for label-free T cell selection and reconstitution**

195 (A) PBMC samples were stained with lymphocyte subpopulation-representing fluorescence

196 antibodies. Data was acquired by flow cytometer and the forward/side-scattering (FSC/SSC)

197 distribution of main lymphocyte populations and T cell naive/memory subsets were studied.

198 (B) Based on the FSC/SSC profile of lymphocyte populations, a computational gate design

199 algorithm was performed to enrich specific target cell type with optimal purity and yield.

200 (C) Alternatively, a manual gating strategy relied on the SSC intensity was used to reconstitute

201 lymphocyte populations with distinct functionality.

202 (D) The manually selected gate was applied for the sorting of unstained lymphocytes for  
203 optimum T cell production.

204 (E) A comprehensive comparison of the quantity and quality of T cell products that were derived  
205 from cellular materials with different SSC intensity. Characterization of factors contributing to  
206 the distinct products by longitudinally phenotypic assessment and correlation analysis.

207 See also **Table S1** and **Methods**.

208

## 209 **TRuST enables effective reconstitution of functionally distinct lymphocyte** 210 **subpopulations**

211 Lymphocyte cluster can be robustly separated from monocytes and granulocytes  
212 based on their FSC/SSC distribution as has been routinely used in flow cytometry.

213 However, a comprehensive study of the subtle scattering profile within various  
214 lymphocyte subpopulations is still absent (**Figure 1A**). Using human lymphocytes pre-

215 stained with cell type markers, we found that CD4<sup>+</sup> T, B cells and T<sub>N</sub> have a lower SSC  
216 (low granularity) compared to CD8<sup>+</sup> T, NK and differentiated T cells such as T<sub>CM</sub>, T<sub>EM</sub>

217 and T<sub>EMRA</sub> (high granularity) (**Figures 2A and 2B**). With the gradual increase of SSC  
218 intensity, there are more CD8<sup>+</sup> T and NK cells, as well as more differentiated T cell

219 subsets, leading to percentage reduction of CD4<sup>+</sup> T and T<sub>N</sub> cells (**Figure S2**). For  
220 consistency throughout this work, we manually dived the total lymphocytes into two

221 equal parts (SSC<sup>high</sup> and SSC<sup>low</sup>). This gating method is robust enough to either sample  
222 staining procedures (**Figures S3A and S3B**) or voltages change applied during flow

223 cytometry data acquiring (**Figures S3A, S3C, and S3D**). On the contrary, FSC can

224 only differentiate B cells from NK cells (**Figures S3E-S3G**). The nearly unaltered light  
225 scattering profiles between stained and unstained cells (**Figure S3B**) enable us to  
226 directly apply the gate in sorting of unstained lymphocytes (**Figure 2C**). Similarly,  
227 sorted SSC<sup>low</sup> group enriches for CD4<sup>+</sup> T cells and naïve T cells while SSC<sup>high</sup> cluster  
228 enriches for CD8<sup>+</sup> T, NK and other more-differentiated T cell counterparts including T<sub>CM</sub>,  
229 T<sub>EM</sub> and T<sub>EMRA</sub> (**Figures 2D-2G**). Deep-ultraviolet light (UV) has been adopted for label-  
230 free molecular imaging (Zeskind et al., 2007) and hematology analysis (Ojaghi et al.,  
231 2020) thanks to its shorter wavelength. Thus, it is interesting to study whether UV light  
232 (e.g. UV405 nm) can be used to further improve the scattering resolution of cell  
233 morphometric structure under blue light (e.g. B488 nm). However, we observed that a  
234 double side-scatter (UV405/B488) based sorting strategy (**Figure S3H**) did not  
235 improve the general segregation efficiency of CD4/CD8 T cells, NK/B cells and  
236 naïve/memory T cells as well (**Figures S3I-S3M**). Therefore, global cellular granularity,  
237 as represented by SSC intensity, could be a general biophysical property used for the  
238 separation of lymphocyte subpopulations.

239

240 Next, we sought to characterize the phenotypes of sorted cell populations based solely  
241 on SSC intensity. The sorted SSC<sup>low</sup> cells displayed a higher expression of  
242 costimulatory receptors such as CD27 and CD28 but a lower expression of  
243 differentiation marker CD127, memory marker CD45RO and activation/inhibition  
244 factors CD95/CD57 (**Figure 2H**), consistent with a larger number of naïve T cells in  
245 this cell cluster. Unexpectedly, T cells of the same differentiation lineage but different

246 SSC intensity also manifested some distinguishable phenotypic traits (**Figures 2I and**  
247 **2J**). For example, either  $T_N$  or  $T_{CM}$  in  $SSC^{low}$  group had reduced CD127, CD95 and to  
248 a less extent CD57 (**Figure 2I**). Instead,  $T_{CM}$  of  $SSC^{low}$  cluster had increased CD27  
249 (**Figure 2I**) and CCR7/CD45RA abundance (**Figure 2J**), suggesting its central memory  
250 precursor-like phenotype. Functionally, in response to short pulse of protein kinase C  
251 (PKC) stimulus, the  $SSC^{low}$  lymphocytes produced a large amount of IL-2 but reduced  
252 IFN- $\gamma$ -involved immediate effector cytokines (**Figures 2K and 2L**), resembling  
253 cytokine expression dynamics of early-differentiated T cells (Denton et al., 2011;  
254 Hinrichs et al., 2009). The large amount of IFN- $\gamma$  but near absence of IL-2 expression  
255 in non-T lymphocytes of  $SSC^{high}$  group is in line with a high proportion of NK cells in  
256 this cluster (**Figures 2M and 2E**). Taken together, these findings suggest that younger  
257 T cell lineages including naïve T cells and central memory precursors are intrinsically  
258 endowed with a lower SSC, which, concurrently with a higher ratio of CD4<sup>+</sup> T to CD8<sup>+</sup>  
259 T cells can be effectively enriched by TRuST.  
260 (main text continued after Figure 2)

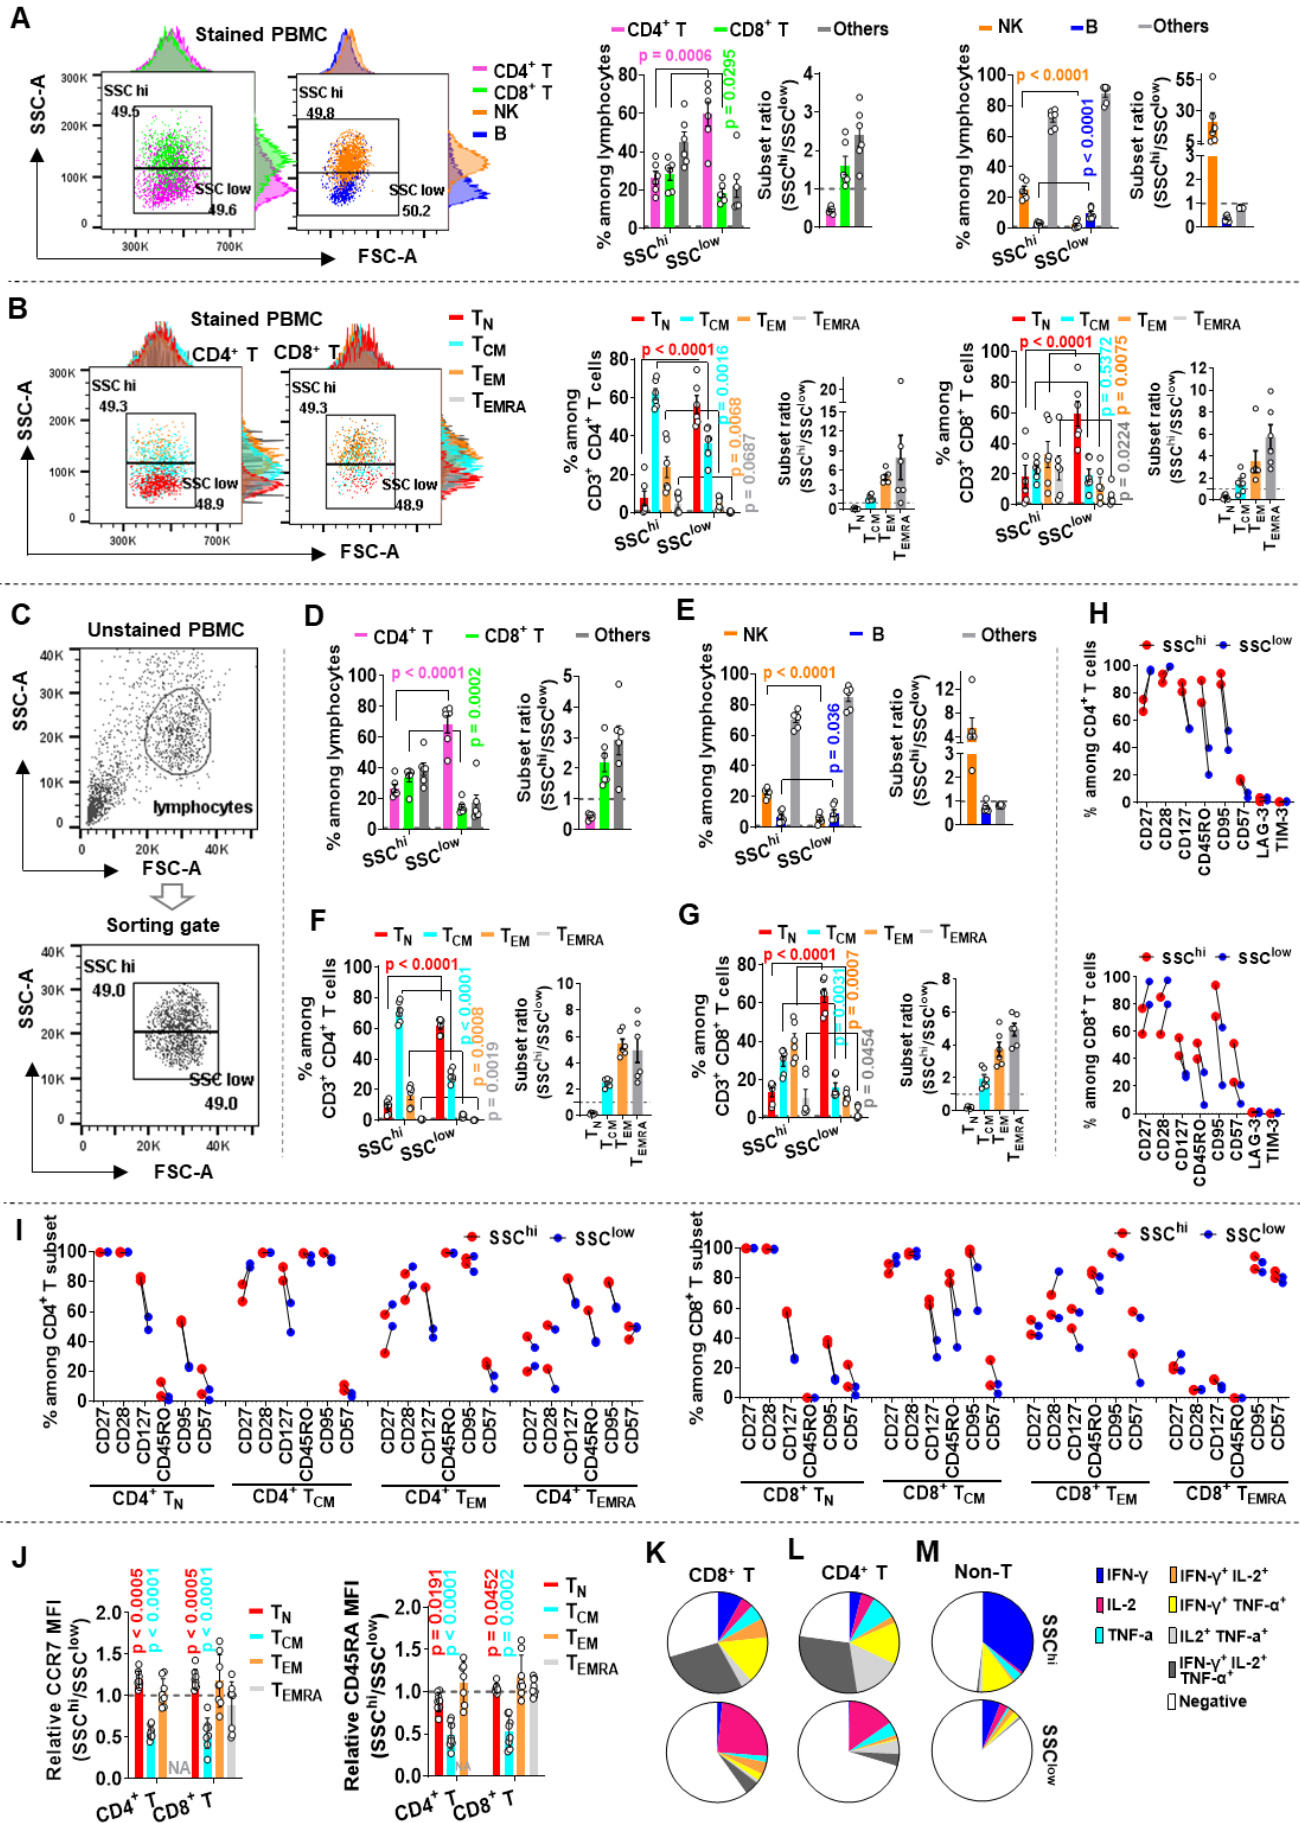

262 **Figure 2. SSC is a robust biophysical property for TRuST development**

263 **(A and B)** PBMC samples were stained with surface marker antibodies before flow cytometry  
264 data acquiring. Dot plots are representative FSC/SSC profiles of CD3<sup>+</sup> CD4<sup>+</sup> T/CD3<sup>+</sup> CD8<sup>+</sup> T  
265 cells **(A, left dot plot)**, NK/B cells **(A, right dot plot)**, and T<sub>N</sub>/T<sub>CM</sub>/T<sub>EM</sub>/T<sub>EMRA</sub> cell subsets **(B)**.  
266 For statistical analysis, samples were gated to equally divide the cells into two clusters based  
267 on the cluster of total lymphocytes (not shown in the dot plots) **(A and B, dot plots)** and the  
268 percentage of CD3<sup>+</sup> CD4<sup>+</sup> T/CD3<sup>+</sup> CD8<sup>+</sup> T cells, NK/B cells, and T<sub>N</sub>/T<sub>CM</sub>/T<sub>EM</sub>/T<sub>EMRA</sub> cell subsets  
269 within SSC<sup>hi</sup> or SSC<sup>low</sup> cluster were summarized **(A and B, histograms)**. Two independent  
270 experiments for each donor (n = 3) were compiled. A two-tailed, paired *t*-test between the two  
271 groups was performed. Error bars indicate mean ± SEM.

272 **(C-G)** Unstained PBMC samples were equally sorted into SSC<sup>hi</sup> and SSC<sup>low</sup> populations before  
273 lymphocyte subtypes determination **(C)**. Characterization of the percentage of CD3<sup>+</sup> CD4<sup>+</sup>  
274 T/CD3<sup>+</sup> CD8<sup>+</sup> T cells **(D)**, NK/B cells **(E)**, and T<sub>N</sub>/T<sub>CM</sub>/T<sub>EM</sub>/T<sub>EMRA</sub> **(F and G)** among the sorted  
275 SSC<sup>hi</sup> and SSC<sup>low</sup> cell populations. Data from three donor samples with two independent  
276 experiments for each donor were compiled. A two-tailed, paired *t*-test between the two groups  
277 was performed. Error bars indicate mean ± SEM.

278 **(H and I)** A comparison of the expression profiles of selected phenotyping markers in sorted  
279 SSC<sup>hi</sup> and SSC<sup>low</sup> cells **(H)**, and characterization of the phenotypic traits of the same  
280 naïve/memory T subset derived from SSC<sup>hi</sup> or SSC<sup>low</sup> cell clusters **(I)**. Each dot represents data  
281 of one donor PBMC **(H and I)**.

282 **(J)** The relative expression level of CCR7 and CD45RA in CD4<sup>+</sup> T or CD8<sup>+</sup> T naïve/memory  
283 subsets from sorted SSC<sup>hi</sup> and SSC<sup>low</sup> cells. Plots represent data from three donor PBMC. Cell

284 subset nearly undetectable is indicated as “NA”. A two-tailed, unpaired *t*-test between SSC<sup>hi</sup>  
285 and SSC<sup>low</sup> groups was performed. Error bars indicate mean ± SEM.

286 **(K-M)** Sorted SSC<sup>hi</sup> and SSC<sup>low</sup> cells were stimulated with PMA plus ionomycin for 4 hours  
287 before intracellular staining. Shown are the multifunctional cytokine expression profile of CD3<sup>+</sup>  
288 CD8<sup>+</sup> T cells (**K**), CD3<sup>+</sup> CD8<sup>-</sup> T cells (**L**), and CD3<sup>-</sup> cells (**M**) within sorted sorted SSC<sup>hi</sup> or SSC<sup>low</sup>  
289 cells (n = 2).

290 See also **Figure S1** for gating methods in determining cell types and multifunctionality analysis,  
291 **Figures S2** and **S3** for manual gating selection.

292

### 293 **TRuST enhances lymphocyte subset selection using computational gate design**

294 While manual gating for cell sorting is a simple and effective way to reconstitute  
295 lymphocytes, it could be less efficient for the selection of specific lymphocyte subset.

296 Thus, we took advantage of the recently developed computational algorithm, GateID  
297 (Baron et al., 2019), that relies on the general properties (e.g. cell size, granularity and  
298 mitochondrial content) to search for the optimum gate for cell type enrichment. Using  
299 this method, it is possible to obtain lymphocyte subsets of interest with desired purity  
300 and yield (**Figure 3**).

301

302 Naïve T cells can be obtained with the highest purity and acceptable yield (**Figure 3E**),  
303 in line with their location within the cell group of lowest SSC (**Figure 2B**). T<sub>CM</sub>, T<sub>EM</sub>,  
304 T<sub>EMRA</sub>, total CD4<sup>+</sup> T and NK cells can also be significantly enriched, but at the expense  
305 of quickly dropped yields (**Figures 3F-3H, 3A, and 3C**). On the other hand, CD8<sup>+</sup> T



306 cells and B cells tend to be the most difficult lymphocytes to be enriched with an  
307 improved purify and appreciable yield, partially due to their relatively homogeneous  
308 side-scattering distribution diffused into other lymphocytes (**Figures 3B and 3D**).  
309 Notably, given that a comparable FSC/SSC pattern was observed between unstained  
310 and stained cell samples (**Figure S3B**), it would be possible to directly apply the  
311 predicted gate in actual sorting experiments without gate normalization. Thus,  
312 combining TRuST with computational gate search, it is feasible to improve the purity  
313 of lymphocyte subsets with a reduced yet still acceptable recovery rate.  
314 (main text continued after Figure 3)

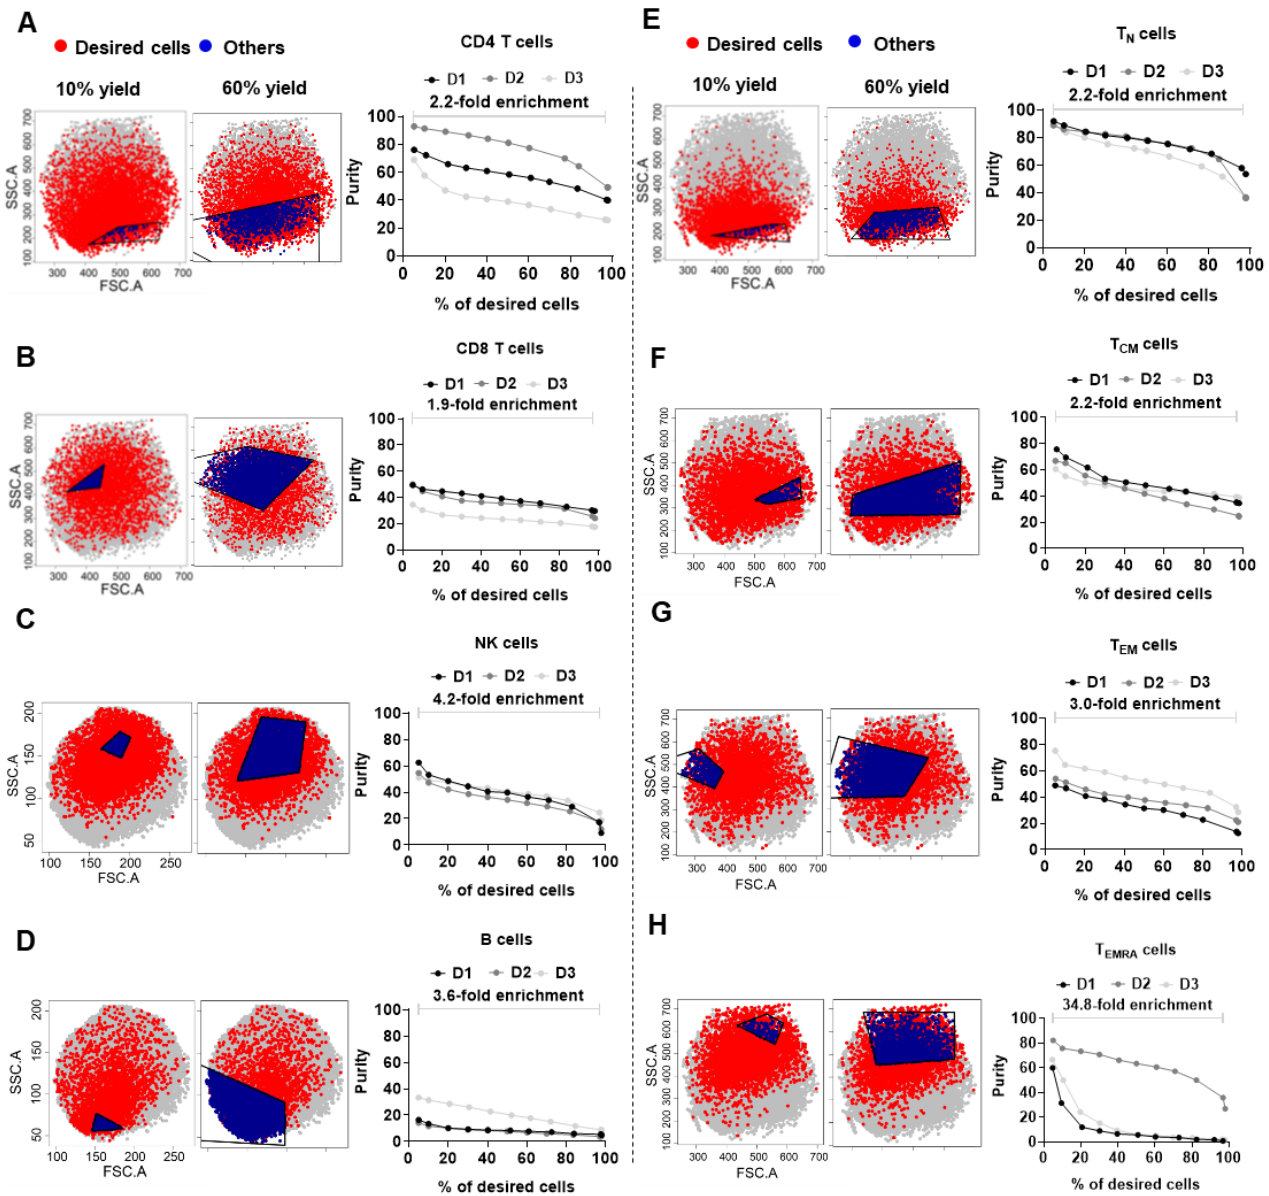

315 **Figure 3. TRuST enhances enrichment of specific lymphocyte subset using**

316 **computational gate design**

317 (A-H) The raw readouts corresponding to FSC and SSC parameters for each cell type as shown

318 in Figures 2A and 2B were exported, named and reanalyzed by GateID algorithm to select the

319 desired cell type. The enrichment efficiency of CD3<sup>+</sup> CD4<sup>+</sup> T (A), CD3<sup>+</sup> CD8<sup>+</sup> T (B), NK (C) and

320 B cells (D), or selection of total T<sub>N</sub> (E), T<sub>CM</sub> (F), T<sub>EM</sub> (G) and T<sub>EMRA</sub> subsets (H) were plotted by

321 automatically adjustable gating threshold. For each cell type/subset, two representative gating

322 plots corresponding to 10% and 60% yields of desired cells, and the correlation plots between

323 purity and yield are shown. An average enrichment fold-increase between ~100% yield to ~5%  
324 yield (n = 3) is indicated. The percentage of desired cells (yield) is calculated as the number of  
325 desired cells within the gating to that of total desired cells among the whole cell population. The  
326 purity indicates the proportion of desired cells to that of total cell numbers within each gate.

327 See also **Methods**.

328

329 **TRuST-relied lymphocytes reconstitution improves T cell product quantity and**  
330 **quality**

331 When practical feasibility and manufacturing cost are taken into consideration, such  
332 as T cell production for adoptive immunotherapy, it might not be necessary to enrich  
333 for a very specific cell type at the expense of greatly reduced cell recovery. Instead,  
334 strategies that enable the reconstitution of lymphocyte subpopulations to maximally  
335 improve cell production without compromising yield and quality would be preferable.

336

337 Given that T cell product derived from less-differentiated T cells show better outcome  
338 in adoptive immunotherapy (Berger et al., 2008; Finney et al., 2019; Fraietta et al.,  
339 2018; Hinrichs et al., 2011), we next investigated how compositional difference of  
340 starting T cell materials reconstituted solely by TRuST under manual gate selection  
341 (**Figure 2C**) may affect the diversity of final T cell products. In response to anti-  
342 CD3/CD28 microbeads stimulation, an antigen-presenting cells-mimic activation  
343 approach widely used for T cell manufacturing, SSC<sup>low</sup> cells consisting of T<sub>N</sub> and  
344 younger T<sub>CM</sub> cells were endowed with superior proliferation capacity, and achieved an

345 average increase of total nucleated cells (TNC) by 2.3-fold at day 7 and 3.2-fold at day  
346 11 with 3-fold increase for CD4<sup>+</sup> T and 4-fold increase for CD8<sup>+</sup> T subtypes (**Figures**  
347 **4A-4C and S4A-S4C**). Unexpectedly, the expansion potential of the SSC<sup>high+low</sup> group  
348 appeared to be equivalent to that of SSC<sup>high</sup> population (**Figures 4A-4C**), likely due to  
349 the precocious differentiation of naïve cells driven by existing effector/memory cells  
350 (Klebanoff et al., 2016) and the inhibitory effects caused by large amount of NK cells  
351 (Cook and Whitmire, 2013).

352

353 Yellow fever-specific central memory CD8<sup>+</sup> T cells with high CD45RA expression was  
354 demonstrated to be a critical cell subpopulation accounting for persistent immune  
355 memory, which resembled stem cell-like memory subset (CCR7<sup>+</sup> CD45RA<sup>+</sup> CD58<sup>+</sup>  
356 CD95<sup>+</sup> CD28<sup>+</sup> CD27<sup>+</sup> T<sub>SCM</sub>) (Fuentes Marraco et al., 2015). Thus, based on the dynamic  
357 change of CCR7/CD45RA expression, an in-depth gating strategy was used to classify  
358 T cell subsets into T<sub>N</sub>, naïve population-closest CD45RA<sup>high</sup> T<sub>CM</sub> (T<sub>CMRA-hi</sub>), CD45RA<sup>low</sup>  
359 T<sub>CM</sub> (T<sub>CMRA-low</sub>), CD45RA<sup>negative</sup> T<sub>CM</sub> (T<sub>CMO</sub>), and T<sub>EM</sub> with CD45RA expression as  
360 CD45RA<sup>high</sup> T<sub>EM</sub> (T<sub>EMRA-hi</sub>), CD45RA<sup>low</sup> T<sub>EM</sub> (T<sub>EMRA-low</sub>) and CD45RA<sup>negative</sup> T<sub>EM</sub> (T<sub>EM</sub>)  
361 (**Figure S4D**). Longitudinal assessment of T cell naïve/memory composition during  
362 expansion showed that, compared to SSC<sup>high</sup> descendants, SSC<sup>low</sup> cells-derived  
363 progenies generally had a higher portion of T<sub>CMRA-hi</sub> but less T<sub>CMRA-low</sub> and other more-  
364 differentiated cell subsets (e.g. T<sub>CMO</sub> and T<sub>EMRA-low</sub>) (**Figures 4D, 4E, and S4E-S4H**).  
365 This finding is consistent with a continuously higher expression of co-stimulatory  
366 molecules CD27/CD28 that favor cell survival and proliferation (**Figures 4F, S5A, and**

367 **S5B)** while other phenotypic traits like memory marker CD45RO and  
368 inhibition/senescence receptors such as CD57, LAG-3 and TIM-3 were more  
369 dynamically variable (**Figures S5A and S5B**).

370

371 Functionally, the SSC<sup>low</sup> cells-derived products responded faster to short period of PKC  
372 activation by producing more IL-2 and TNF- $\alpha$  but less IFN- $\gamma$  (**Figure 4G**). SSC<sup>low</sup> cells-  
373 derived CD4<sup>+</sup> T cells displayed better compliance with this tendency by expressing the  
374 highest amount of early-effector cytokines (e.g. IL-2<sup>+</sup> and IL-2<sup>+</sup> TNF- $\alpha$ <sup>+</sup>) and less late-  
375 effector cytokines (e.g. IFN- $\gamma$ <sup>+</sup>, IFN- $\gamma$ <sup>+</sup> IL-2<sup>+</sup> and IFN- $\gamma$ <sup>+</sup> TNF- $\alpha$ <sup>+</sup>) (**Figure 4H**). The CD8<sup>+</sup>  
376 T counterpart shows a higher diversity and even conflicts these observations post  
377 extensive expansion (e.g. donor 3 at day 11) (**Figure 4I**). Nevertheless, the global  
378 cytokine-expressing trait of cell products generated from SSC<sup>low</sup> group is more naïve-  
379 like (**Figures S5C and S5D**) (Gattinoni et al., 2005; Hinrichs et al., 2009), indicating a  
380 synergic functionality may happen when CD4<sup>+</sup> T and CD8<sup>+</sup> T co-exist in culture system.  
381 Superior engraftment and persistence of infused T cells are critical parameters for  
382 improved therapeutic index. Extensively expanded T cells from either SSC<sup>high</sup>, SSC<sup>low</sup>  
383 or reconstituted SSC<sup>high+low</sup> group had similar chemotactic migration to CCL19/CCL21  
384 (**Figure 4J**), in line with their comparable proportion of total T<sub>CM</sub> (**Figures 4D and 4E**).  
385 However, in response to multiple stimulation by CD3/CD28 engagement, the SSC<sup>low</sup>-  
386 derived progenies were endowed with greater capability for multiple expansion under  
387 both IL-2 and homeostatic cytokines IL-7/IL-15 (**Figure 4K**), presumably associated  
388 with a higher expression of costimulatory markers CD27/CD28 (**Figures 4F, S5A, and**

389 **S5B**) and underlined epidemic modification favoring cell persistence.

390

391 Overall, the SSC<sup>low</sup> lymphocytes-derived T cell product is discernable from that of

392 SSC<sup>high</sup> group, the former manifests not only superior proliferation but also earlier

393 phenotypes characteristic of apparently increased T<sub>CMRA-hi</sub> and enhanced IL-2/TNF- $\alpha$

394 expression for both CD4<sup>+</sup> T and CD8<sup>+</sup> T cells ((**Figures 4L and 4M**)).

395 (main text continued after Figure 4)

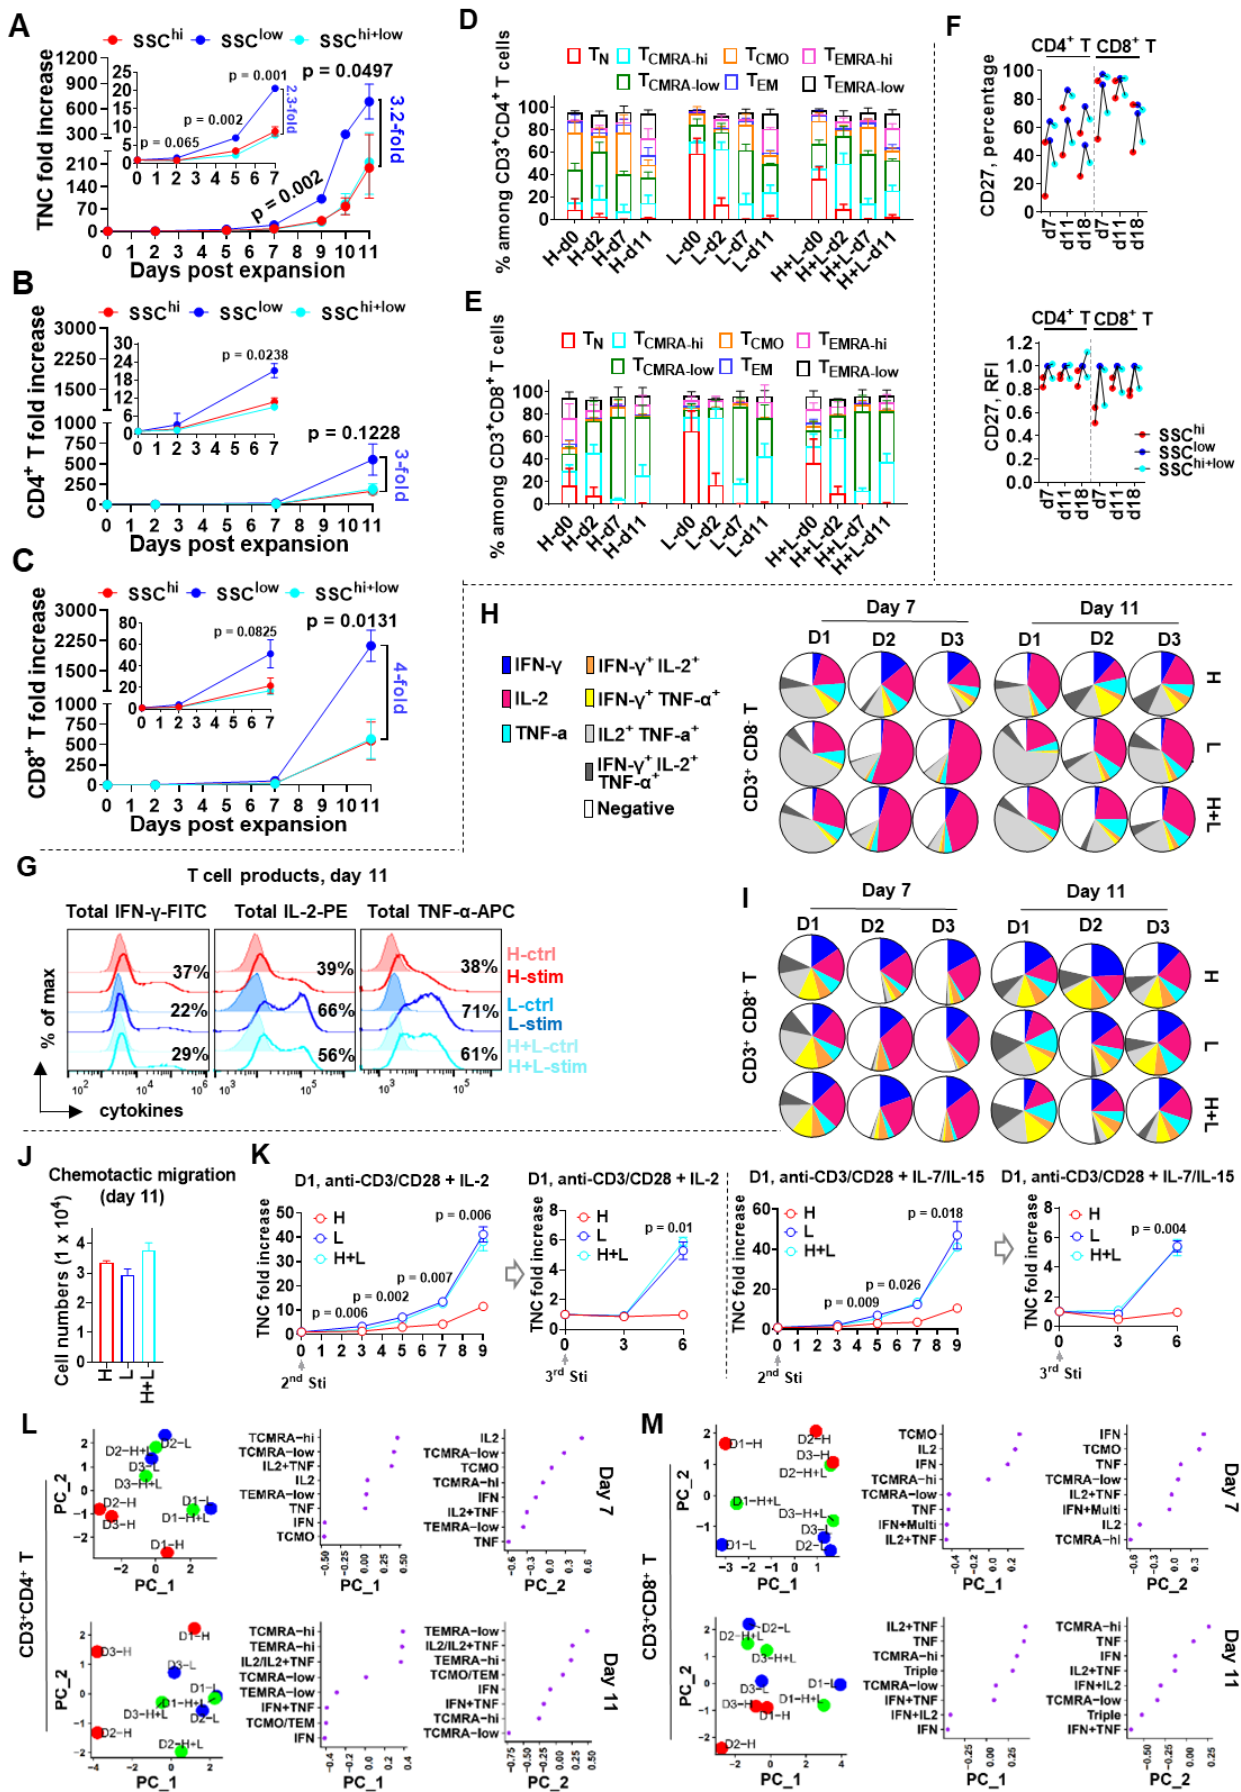

397 **Figure 4. TRuST-relied lymphocytes reconstitution improves T cell product quantity and**

398 **quality**

399 **(A-C)** Expansion efficiency of lymphocytes derived from SSC<sup>hi</sup>, SSC<sup>low</sup>, or reconstituted

400 SSC<sup>hi+low</sup> cells at a ratio of 1:1 are represented by TNC fold increase **(A)**, CD3<sup>+</sup> CD4<sup>+</sup> T **(B)** and

401 CD3<sup>+</sup> CD8<sup>+</sup> T fold increase **(C)**. Data are presented as means ± S.E.M (n = 3). Paired two-tailed

402 *t*-test between SSC<sup>low</sup> and SSC<sup>hi</sup> group was performed. Error bars indicate mean ± SEM.

403 **(D and E)** Compositional change of naive/memory subsets in CD3<sup>+</sup> CD4<sup>+</sup> T **(D)** or CD3<sup>+</sup> CD8<sup>+</sup>

404 T cells **(E)** plotted along the days of expansion. Error bars indicate mean ± SEM.

405 **(F)** Percentage and relative fluorescence intensity (RFI) of CD27.

406 **(G-I)** Representative histogram plot of IFN- $\gamma$ /IL-2/TNF- $\alpha$  expression of cell product at day 11

407 post expansion derived from cell groups with different side-scattering intensity **(G)**.

408 Multifunctional cytokine expression of total CD4<sup>+</sup> T **(H)** or CD8<sup>+</sup> T **(I)** cells at day 7 and day 11

409 post expansion (n = 3) with 2 independent experiments for donor 1 and 2.

410 **(J)** Migration capacity of T cells at day 11 post expansion derived from SSC<sup>hi</sup>, SSC<sup>low</sup> and

411 SSC<sup>hi+low</sup> groups. Error bars indicate mean ± SEM.

412 **(K)** Responsiveness of effector cells descended from SSC<sup>hi</sup>, SSC<sup>low</sup> and SSC<sup>hi+low</sup> groups at

413 day 11 post expansion to multi-stimulation by CD3/CD28 engagement with IL-2 **(top)** or

414 homeostatic cytokines IL-7 plus IL-15 **(bottom)**. Duplicates for each sample were performed.

415 Unpaired two-tailed *t*-test between SSC<sup>low</sup> and SSC<sup>hi</sup> group was performed. Error bars indicate

416 mean ± SEM.

417 **(L and M)** All phenotypic parameters and cytokine-expressing values were integrated together

418 for PCA calculation. For data from day 7, IFN- $\gamma$ <sup>+</sup> IL-2<sup>+</sup>/ IFN- $\gamma$ <sup>+</sup> TNF- $\alpha$ <sup>+</sup>/ IFN- $\gamma$ <sup>+</sup> IL-2<sup>+</sup> TNF- $\alpha$ <sup>+</sup> were



419 combined as “IFN+Multi”. “H” and “L” indicate “SSC<sup>hi</sup>” and “SSC<sup>low</sup>”, respectively.

420 See also **Figures S4A-4C and S4E-4G** for individual data, and **Figure S4D** for gating method  
421 in cell differential lineages characterization.

422

423 **Increased T<sub>CMRA-hi</sub> derived from the SSC<sup>low</sup> cell cluster resembles central memory**  
424 **precursors**

425 Given the significant accumulation of T<sub>CMRA-hi</sub> subpopulation that falls in the  
426 conventional central memory gate of the cell products derived from SSC<sup>low</sup> group

427 (**Figures S4D and S1B**), we next sought to define the natural characteristics of this T  
428 cell subset by longitudinally determining its phenotypic change during expansion

429 (**Figures 5A-5E**). We showed that T<sub>CMRA-hi</sub> had a higher expression of canonical  
430 memory marker CD45RO than T<sub>N</sub> but lower than T<sub>CMRA-low</sub> and T<sub>CMO</sub> regardless of CD3<sup>+</sup>

431 CD4<sup>+</sup> T cells (**Figures 5B and 5C**) or CD3<sup>+</sup> CD8<sup>+</sup> T cells (**Figures 5D and 5E**). While  
432 all resting central memory T subsets (T<sub>CMRA-hi</sub>, T<sub>CMRA-low</sub> and T<sub>CMO</sub> at day 0) presented

433 higher death receptor CD95 (a marker used to distinguish T<sub>SCM</sub> from T<sub>N</sub>) (Fuentes  
434 Marraco et al., 2015; Gattinoni et al., 2011) than the T<sub>N</sub> subset, they became similar

435 post activation with nearly complete expression of this marker (**Figures 5B-5E**).

436 Notably, the expression of co-stimulatory markers such as CD27 and CD28 was more  
437 comparable between T<sub>CMRA-hi</sub> and T<sub>N</sub>, especially for CD8<sup>+</sup> T cells (**Figures 5D and 5E**).

438 With regard to inhibitory or senescent factors (e.g. CD57, LAG-3 and TIM-3), CD8<sup>+</sup>

439 T<sub>CMRA-hi</sub> and CD8<sup>+</sup> T<sub>N</sub> expressed similar but less CD57 than other CD8<sup>+</sup> T subsets

440 before activation, which however decayed to a dim expression in all subsets post

441 extensive proliferation (**Figure 5D**). In addition, LAG-3 was dramatically increased in  
442 activated CD8<sup>+</sup> T subsets at day 7 and decreased at day 11, during which T<sub>CMRA-hi</sub>  
443 tended to have a higher LAG-3 expression compared to T<sub>N</sub> but still comparable or even  
444 lower than other memory subsets (**Figures 5D and 5E**). These findings suggest that  
445 T<sub>CMRA-hi</sub> is phenotypically distinct from T<sub>N</sub> and resembles the central memory precursor  
446 with naïve-like phenotypic traits (CCR7<sup>+</sup> CD45RA<sup>high</sup> CD95<sup>+</sup> CD28<sup>+</sup> CD27<sup>+</sup>), which  
447 could be taken into consideration in the evaluation of T cell products by different  
448 manufacturing protocols.

449

450 The burst increase of T<sub>CMRA-hi</sub> at the beginning of T cell activation (day 2, **Figures 4D**  
451 **and 4E**) is well correlated with the initial proportion of T<sub>N</sub>, and this trend maintains from  
452 day 7 to day 11 (**Figure 5F**). In contrast, the existence of more-differentiated CD4<sup>+</sup>  
453 T<sub>CMO</sub> (**Figure 5G**) and CD4<sup>+</sup> T<sub>CMRA-low</sub> (**Figure 5H**) in starting cell materials tend to  
454 counteract the generation of CD4<sup>+</sup> T<sub>CMRA-hi</sub> despite the effects being varied at different  
455 stages post activation. Also, a high number of CD8<sup>+</sup> T<sub>CMRA-low</sub> (**Figure 5H**) and CD8<sup>+</sup>  
456 T<sub>EMRA</sub> (**Figure 5I**) are more likely to reduce the production of CD8<sup>+</sup> T<sub>CMRA-hi</sub>. However, it  
457 is less predictable for CD8<sup>+</sup> T<sub>EMRA-hi</sub> generation based on the cell composition before  
458 expansion (**Figures S6D-S6G**). Of note, CD4<sup>+</sup> T<sub>N</sub> and CD4<sup>+</sup> T<sub>CMO</sub> (**Figures S6D and**  
459 **S6E**) do show evidences of contrary correlation with CD4<sup>+</sup> T<sub>EMRA-hi</sub> production. There  
460 was a sharp decrease of CD8<sup>+</sup> T<sub>EMRA-hi</sub> cells post activation in the SSC<sup>high</sup> group that  
461 consists of a larger proportion of differentiated cell subpopulations (**Figures S4E and**  
462 **S4F**). Thus the dynamical accumulation of terminally differentiated T<sub>EMRA-hi</sub> cells from

463 SSC<sup>low</sup> groups (**Figures S4F and S4G**) could be partially attributed to a more survival-  
464 favoring environment enriched in less-differentiated cell subsets (e.g. T<sub>N</sub>). Additionally,  
465 T<sub>EMRA-hi</sub> displays higher CD27/CD28 expression than the CD45RA-reduced T<sub>EMRA-low</sub> or  
466 T<sub>EM</sub> subset, which is especially apparent for CD8<sup>+</sup> T cells during expansion (**Figures**  
467 **5D and 5E**), suggesting functional potency of this cell subset in cell therapy when  
468 alternative co-stimulatory signaling (e.g. CD28 and 4-1-BB) and accessory factors for  
469 end-stage effector cells proliferation are involved (Fuertes Marraco et al., 2015; van  
470 Leeuwen et al., 2002; Waller et al., 2007). Taken together, these results show that the  
471 pre-enrichment of less-differentiated cells simply by side scatter enables the  
472 maintenance of naïve-like central memory precursors (T<sub>CMRA-hi</sub>) and accordingly  
473 contributes to the slight accumulation of terminally effector-like T<sub>EM</sub> (T<sub>EMRA-hi</sub>).  
474 (main text continued after Figure 5)

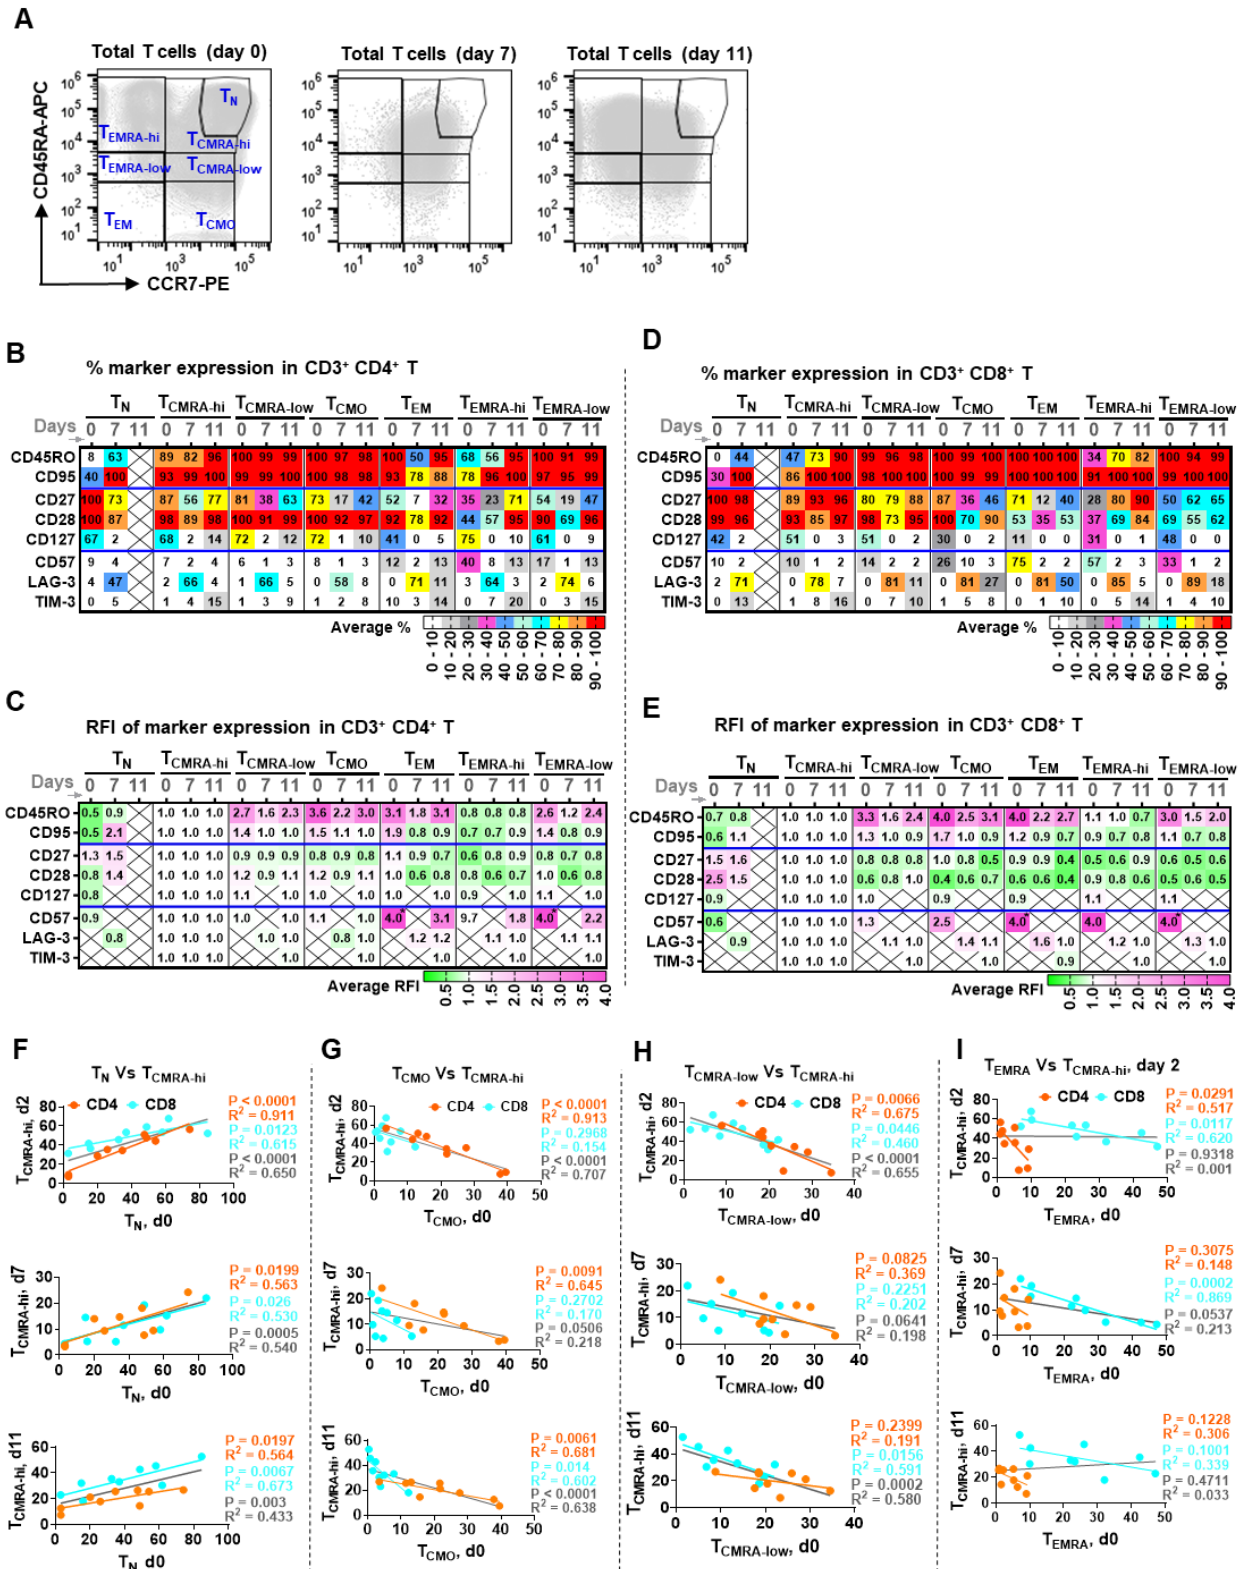

475 **Figure 5. Increased T<sub>CMRA-hi</sub> derived from SSC<sup>low</sup> cell cluster resembles central memory**

476 **precursor**

477 **(A)** Representative plots show the superimposed total T cell populations derived from SSC<sup>hi</sup>,

478 SSC<sup>low</sup> and SSC<sup>hi+low</sup> cells at day 0, 7, 11. T cell subsets to be analyzed are gated.

479 **(B-E)** Longitudinal assessment of phenotypic change of T<sub>CMRA-hi</sub> compared to other T cell  
480 subsets. Average expression frequency of the indicated markers within CD4<sup>+</sup> T or CD8<sup>+</sup> T  
481 subsets **(B and E)** and abundance as presented by relative fluorescence intensity (RFI) was  
482 reported after normalization to the values of T<sub>CMRA-hi</sub> for each marker of the same time points  
483 respectively **(C and E)**. The numbers highlighted by “\*” indicate values large than 4. The cross  
484 indicates omitted data due to low cell percentages for marker expression identification or  
485 insufficient counts for MFI calculation.

486 **(F-I)** Correlation analysis of starting effector/memory composition, including T<sub>N</sub> **(F)**, T<sub>CMO</sub> **(G)**,  
487 T<sub>CMRA-low</sub> **(H)**, and total T<sub>EMRA</sub> **(I)**, with the percentage of generated T<sub>CMRA-hi</sub> among cell products  
488 of each time point. Data from the same day from all of the three donors were combined. Each  
489 dot represents the percentage of generated T<sub>CMRA-hi</sub> versus the initial cellular component of its  
490 starting cell material (day 0). The solid black line indicates combined linear regression using all  
491 the dots in that plot **(F-I)**.

492 See also **Figure S4D** for gating method in identifying the dynamic change of T cell lineages  
493 during expansion, and **Figures S6A-6C** for individual data of phenotypic marker expression in  
494 each T cell subset. **Figures S6D-6G** for correlation analysis of initial cell composition with T<sub>EMRA-</sub>  
495 <sub>hi</sub> generation.

496

#### 497 **CD4<sup>+</sup> T cells help is critical for optimum CD8<sup>+</sup> T cells proliferation**

498 A shaper ratio decrease of CD4/CD8 T cells during expansion was observed for cells  
499 from lower side-scatter, which initially have the largest proportion of CD4<sup>+</sup> T cells and

500 later the highest expansion capacity (**Figure 6A**). This has inspired us to understand  
501 the role of CD4<sup>+</sup> T-CD8<sup>+</sup> T cells crosstalk in T cell proliferation and functionality shaping  
502 despite the absence of specific external antigens (**Figure 6B**).

503

504 Co-culture of CD4<sup>+</sup> T-CD8<sup>+</sup> T cells favored the global expansion of total T cells (**Figure**  
505 **6C**). Help from CD4<sup>+</sup> T cells was required for CD8<sup>+</sup> T cells maximal proliferation by an  
506 average of 6-fold increase at day 7 and 8.5-fold increase at 18 (**Figure 6D**). In turn,  
507 CD8<sup>+</sup> T cells reduced CD4<sup>+</sup> T cells expansion to a lesser extent by 1.4-fold reduction  
508 at day 7 and 2-fold decrease at day 11 and 18 (**Figure 6E**). Thus, the orchestrated  
509 growth dynamics within CD4<sup>+</sup> T and CD8<sup>+</sup> T cells results in final T cell products with  
510 not only different absolute cell numbers (**Figure 6C**) but also discernable CD4<sup>+</sup> T to  
511 CD8<sup>+</sup> T ratio (**Figure 6F**).

512 (main text continued after Figure 6)

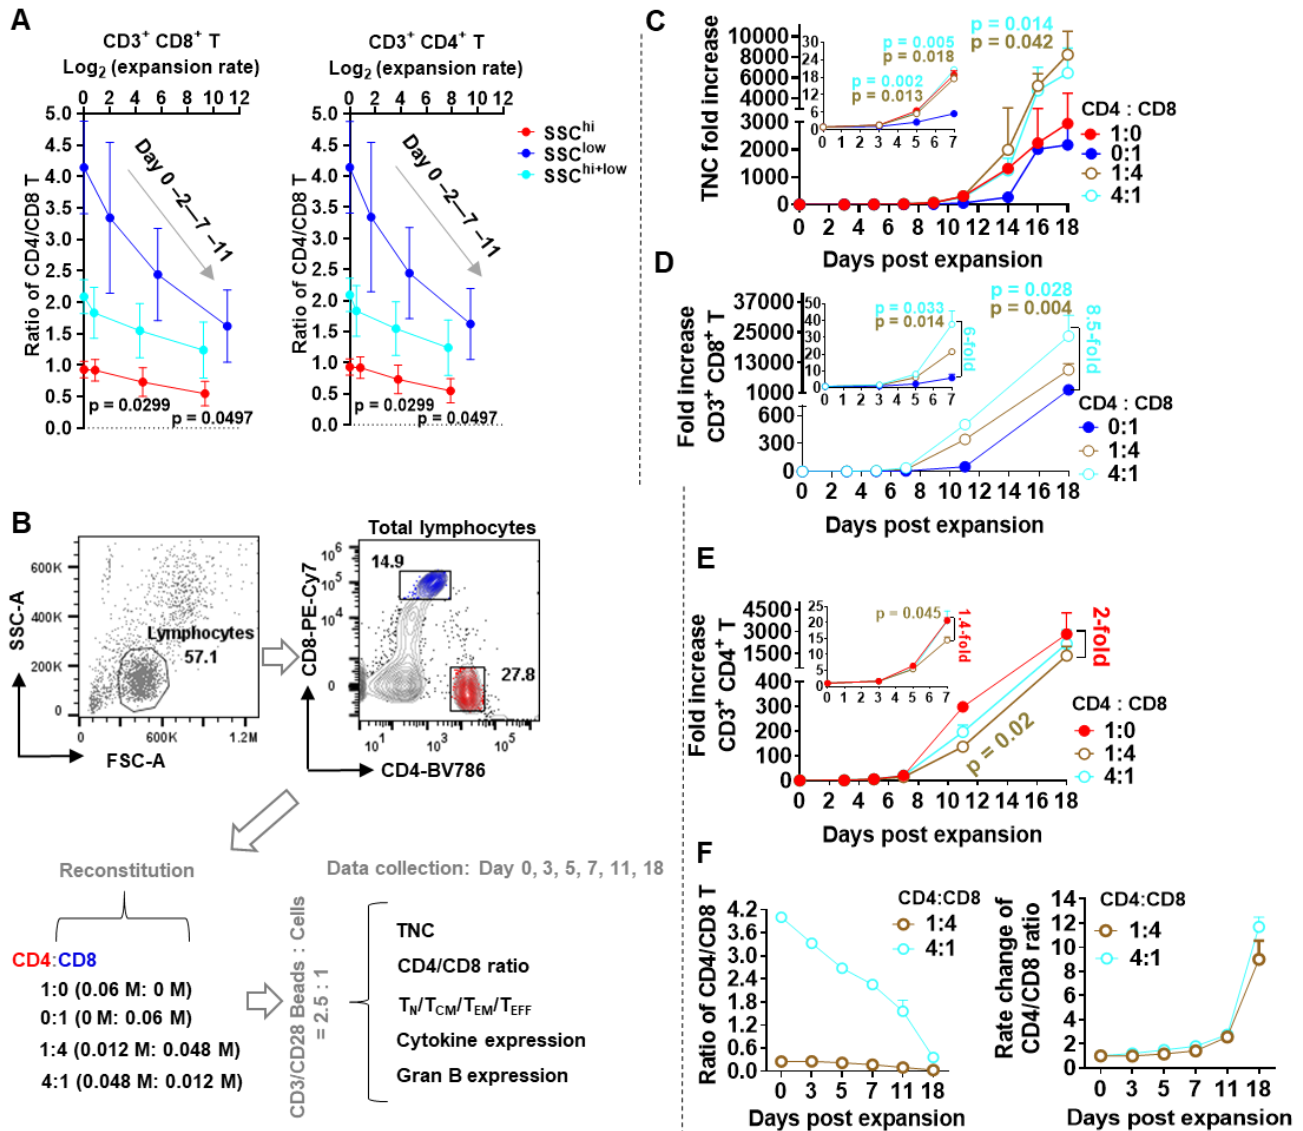

513 **Figure 6. CD4<sup>+</sup> T help is required for optimal CD8<sup>+</sup> T expansion**

514 (A) Synchronized T cell expansion efficiency with the ratio change of CD4/CD8 T cells starting  
515 from cell materials of different side-scattering intensity. Data are representative of three donors  
516 as described in Figures 4A-4C. Graphs represent means ± S.E.M (n = 3). Paired two-tailed *t*-  
517 test was used for statistical calculation between SSC<sup>hi</sup> and SSC<sup>low</sup> group. Error bars indicate  
518 mean ± SEM.

519 (B) CD4<sup>+</sup> cells and CD8<sup>+</sup> cells were sorted and validated to have more than 96% of CD3<sup>+</sup> CD4<sup>+</sup>  
520 T and CD3<sup>+</sup> CD8<sup>+</sup> T cells, respectively. CD4<sup>+</sup> cells and CD8<sup>+</sup> cells were reconstituted at the

521 indicated ratio and co-expanded by CD3/CD28 engagement.

522 **(C-E)** Proliferative potential of TNC **(C)**, CD3<sup>+</sup> CD4<sup>+</sup> T **(D)** or CD3<sup>+</sup> CD8<sup>+</sup> T cells **(E)** in condition

523 of CD4-CD8 T cells co-culture. Data of day 5, 7, 11 and 18 represent two independent

524 experiments. Unpaired two-tailed *t*-test compared to culture condition of CD8<sup>+</sup> T cells only **(C**

525 **and D)** or CD4<sup>+</sup> T cells only **(E)**. Error bars indicate mean ± SEM.

526 **(F)** Changes in the ratios of CD4<sup>+</sup> T to CD8<sup>+</sup> T cells in samples starting with high (4:1) and low

527 (1:4) ratios of CD4 to CD8 T cells. Error bars indicate mean ± SEM.

528

### 529 **CD4<sup>+</sup> T cells promote CD8<sup>+</sup> T early central memory pool maintenance**

530 By longitudinal assessment of T cell naive/memory composition, we found that

531 optimum maintenance of CD8<sup>+</sup> T<sub>CMRA-hi</sub> but less CD8<sup>+</sup> T<sub>EM</sub> and CD8<sup>+</sup> T<sub>EMRA-low</sub> can be

532 achieved in the presence of CD4<sup>+</sup> T cells in a ratio-dependent manner **(Figure 7A)**.

533 Interestingly, the mild accumulation of CD8<sup>+</sup> T<sub>EMRA-hi</sub> was also observed, similar to that

534 of SSC<sup>low</sup> cells-derived descendants **(Figures S4F and S4G)**, indicating a superior

535 culture environment for T cell survival endowed by CD4<sup>+</sup> T. On the contrary, a large

536 proportion of CD8<sup>+</sup> T cells tended to counteract CD4<sup>+</sup> T<sub>CMRA-hi</sub> generation during the

537 early expansion stages (e.g. day 0-7) **(Figure 7B)**. This is reflected by a higher

538 expression of CD28 on CD8<sup>+</sup> T cells but lower on CD4<sup>+</sup> T cells throughout the co-

539 culture course **(Figures 7C, S7A, and S7B)**. Also, the increased number of less-

540 differentiated CD8<sup>+</sup> T cells generated at day 11 under CD4<sup>+</sup> T-CD8<sup>+</sup> T co-expansion is

541 consistent with a greater migration ability to CCL19/CCL21 **(Figure 7D)**.

542



543 With respect to functional shaping, it is clear that CD4<sup>+</sup> T and CD8<sup>+</sup> T cells mutually  
544 endowed each other with a higher granzyme B expression during the initial proliferation  
545 phase (day 0 - 7, **Figures 7E and 7F**). However, CD8<sup>+</sup> T cells from all conditional  
546 groups became comparable in granzyme B expression at day 11 while a larger portion  
547 of CD4<sup>+</sup> T cells continued to express granzyme B in the presence of CD8<sup>+</sup> T cells  
548 (**Figures 7F**). In addition, CD4<sup>+</sup> T help contributed to the generation of less-  
549 differentiated CD8<sup>+</sup> T cells characteristic of enhanced IL-2 /TNF- $\alpha$  but reduced IFN- $\gamma$   
550 production (**Figures 7G**). Instead, CD8<sup>+</sup> T cells showed only moderate inhibition on  
551 the secretion of IL-2/TNF- $\alpha$  by CD4<sup>+</sup> T cells (**Figures 7G**). Moreover, the inclusion of  
552 resting CD4<sup>+</sup> T cells was able to rescue the expansion potency of extensively  
553 differentiated CD8<sup>+</sup> T cells (**Figures 7H**). Therefore, despite the absence of cognate  
554 antigens, help from CD4<sup>+</sup> T cells is critical for shaping the proliferative capacity and  
555 functional potency of CD8<sup>+</sup> T cells, which should be an important factor to be  
556 considered during T cell manufacturing.  
557 (main text continued after Figure 7)

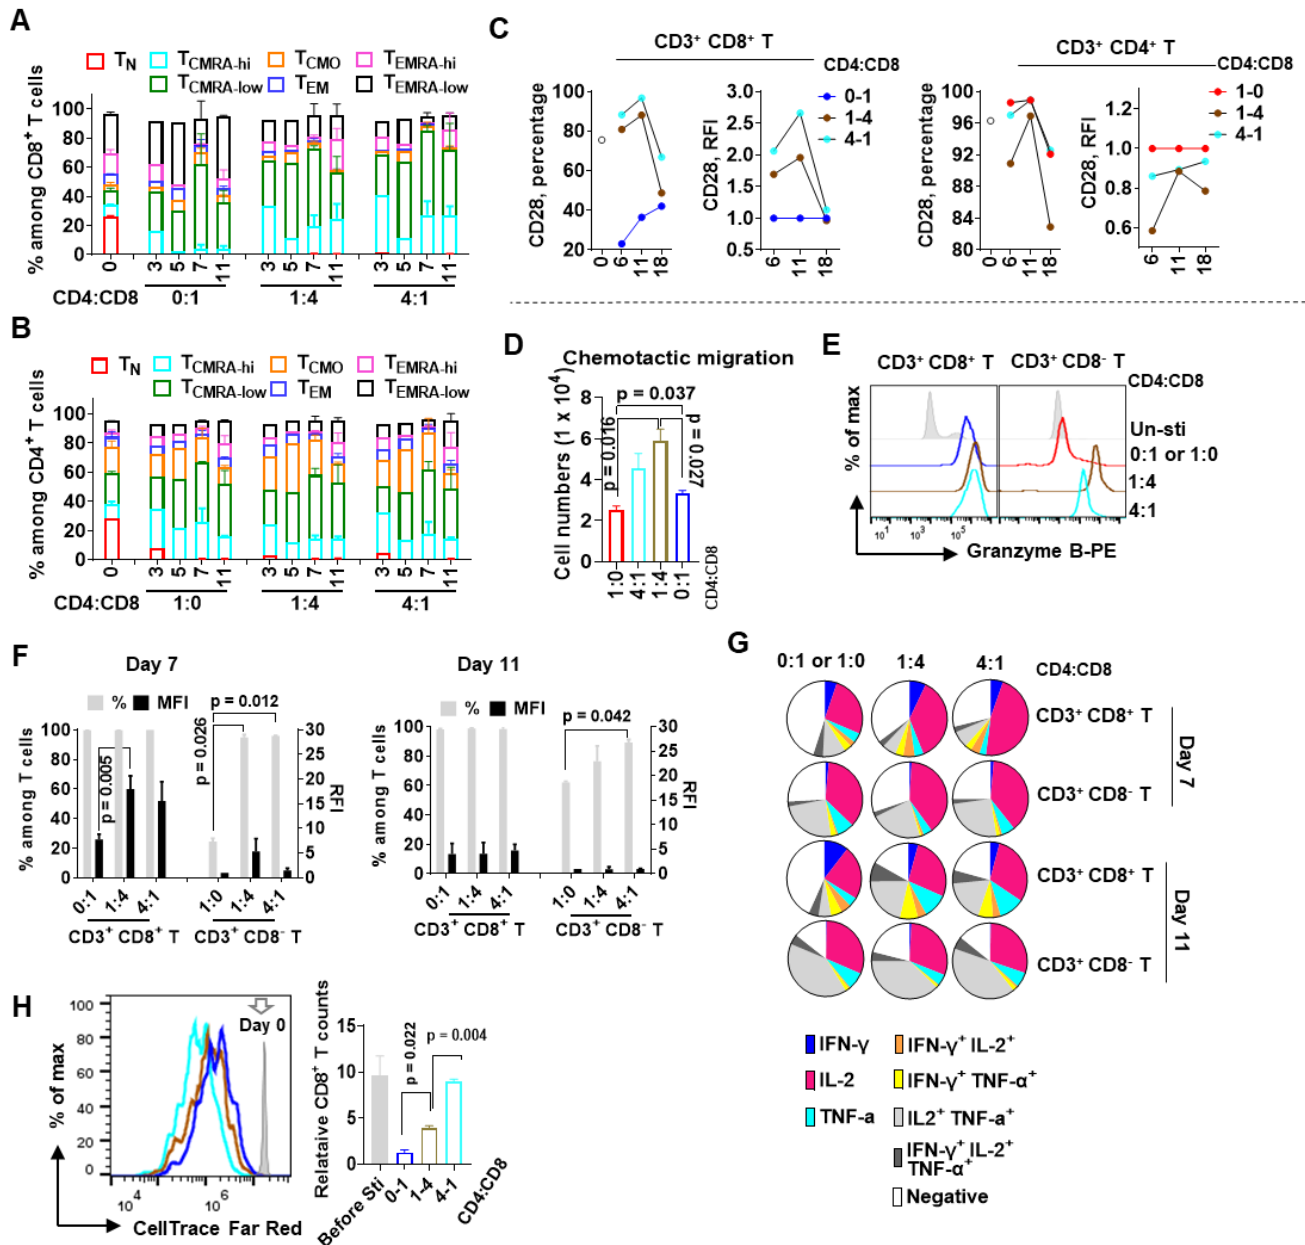

558 **Figure 7. CD4<sup>+</sup> T cells promote the maintenance of CD8<sup>+</sup> T early central memory pool**

559 **(A and B)** Compositional change of naive/memory subsets in CD3<sup>+</sup> CD8<sup>+</sup> T **(A)** or CD3<sup>+</sup> CD4<sup>+</sup>

560 T cells **(B)** along the days of expansion. Data for day 0, 7 and 11 are representative of two

561 independent experiments. Error bars indicate mean ± SEM.

562 **(C)** Dynamic expression of CD28 is represented by both percentage and relative fluorescence

563 intensity of T cell products from CD4-CD8 T cells co-expansion. The medium fluorescence

564 intensity (MFI) is normalized to that of CD4<sup>+</sup> T cells or CD8<sup>+</sup> T cells cultured separately at the

565 indicated time points.

566 **(D)** CCL21/CCL19-driven migration capacity of T cell generated at day 11 starting from different  
567 CD4<sup>+</sup> to CD8<sup>+</sup> T cell ratio. Data represents duplicate experiments. Error bars indicate mean ±  
568 SEM.

569 **(E and F)** Representative plot of granzyme B-expressing T cells at day 7 post expansion **(E)**  
570 and summary of T cells in granzyme B expression from data of two independent experiments  
571 **(F)**. Error bars indicate mean ± SEM.

572 **(G)** Multifunctional cytokine expression of CD3<sup>+</sup> CD8<sup>+</sup> T or CD3<sup>+</sup> CD4<sup>+</sup> T cells at day 7 and day  
573 11 post expansion.

574 **(H)** Resting CD4<sup>+</sup> T cells were sorted and spiked into CellTrace dye-labeled T cell products (day  
575 13) at the indicated ratio and co-stimulated (cells to beads = 1 : 1) for 4 days. Duplicates for  
576 each group were performed. Cells were counted at day 4 before collection for anti-CD4-BV786  
577 staining and analysis by flow cytometer. Cell counts were normalized to cell group without newly  
578 added CD4<sup>+</sup> T. Unpaired two-tailed *t*-test between two groups was performed. Error bars  
579 indicate mean ± SEM.

580 See also **Figure S7**.

581

## 582 **DISCUSSION**

583 TRuST provides a novel method that enables label-free reconstitution of lymphocyte  
584 subpopulations using the intrinsic side-scattering property of cells. We demonstrate  
585 that less-differentiated T cells are endowed with a lower SSC intensity, which, together  
586 with a high ratio of CD4/CD8 T cells, can be effectively enriched and used for optimum

587 T cell production (**Figures 2 and 4**). Furthermore, we address that both naïve T cells  
588 and a higher CD4<sup>+</sup> T to CD8<sup>+</sup> T proportion are critical for maximal CD8<sup>+</sup> T cells  
589 expansion and optimal CD8<sup>+</sup> T memory precursors maintenance (**Figures 5-7**).

590

591 Naïve T cells have discernable morphological profiles from memory/effector T cells  
592 under transmission electron microscope (Dimeloe et al., 2016). Our work  
593 demonstrates that this difference can be recaptured simply by using the side-scattering  
594 property, which would be more practically meaningful in a high-throughput and cost-  
595 effective manner. We showed that SSC is a robust biophysical attribute, the distribution  
596 pattern of which presents the intrinsic granularity difference of cellular context and is  
597 unaffected by either sample processing or voltage changes applied during data  
598 acquisition (**Figures S3A-S3D**). Thus, when applying the gate settings determined  
599 using pre-stained cell samples to the unstained cell samples, no gating normalization  
600 is required for T cell reconstitution by manual gate selection (**Figures 2 and 4**) and  
601 only slight gating correction is required for cell type purification by computational gate  
602 search (**Figure 3**). With a single sorting step based on the SSC intensity, lymphocyte  
603 populations with high CD4<sup>+</sup> T to CD8<sup>+</sup> T ratio are clustered together with younger T  
604 cells (e.g. T<sub>N</sub> and early T<sub>CM</sub>) among the cells of lower SSC. This strategy has been  
605 described to meet the demands of current T cell manufacturing procedures in both  
606 quantity and quality (**Figures 4, S4, and S5**). A significantly higher yield of T cell with  
607 more memory precursors can be achieved from the sorted SSC<sup>low</sup> cell population. In  
608 addition, a comparable amount of T cells with stronger immediate effector function due

609 to the production of late-differentiated effector cells, can also be obtained from the  
610 SSC<sup>high</sup> cluster when compared to unfractionated total lymphocytes. On the other hand,  
611 the majority of NK cells can be assigned to SSC<sup>high</sup> population, which would be useful  
612 if antibody-free methods are preferred for NK cells segregation (Hu et al., 2019).

613

614 Apheresis materials with high baseline T cell dysfunction (LAG-3<sup>+</sup>/TNF- $\alpha$ <sup>low</sup> CD8<sup>+</sup> T)  
615 before cell manufacturing was reported to correlate with the non-responding rate of B-  
616 CLL patients while a more memory-like functional profile predicts better response  
617 (Finney et al., 2019). Similarly, sustained disease remission in B-cell acute  
618 lymphoblastic leukemia (B-ALL) patients was associated with memory-like CD27<sup>+</sup>  
619 CD45RO<sup>-</sup> CD8<sup>+</sup> T cells before CAR T engineering (Fraiatta et al., 2018). Interestingly,  
620 we observed that T cell progenies derived from SSC<sup>low</sup> group have significantly  
621 accumulated CD8<sup>+</sup> T<sub>CMRA-hi</sub> subpopulation, which is endowed with naïve-like cytokine  
622 expression profile (**Figures 4G-4I, S5C, and S5D**) and increased co-stimulatory  
623 markers CD27/CD28 but reduced CD45RO/LAG-3 especially during the early  
624 expansion phases (**Figures 4F and S5B**). This finding is of great interest for further  
625 studies. In addition, tumor histology heterogeneity (e.g. tumor burden and anatomic  
626 distribution) and T cell immunosuppression/persistency mechanisms play important  
627 roles in cancer immunity and treatment (Majzner and Mackall, 2019). Here we  
628 conceive a sequential infusion regimen, that combines highly potential effector cells  
629 (SSC<sup>high</sup>-derived) to immediately mitigate tumor load and followed by less-  
630 differentiated cells (SSC<sup>low</sup>-derived) to improve long-term tumor surveillance. However,

631 it remains to be validated whether such a treatment regimen would be more efficacious  
632 in refractory tumors aimed to maximally alleviate side effects (e.g. cytokine-releasing  
633 syndrome and neurotoxicity) while preventing huge tumor burden-caused T cell over-  
634 activation/exhaustion. The work has demonstrated its feasibility by producing  
635 adequate cell doses but with distinctive cellular quality from one packet of apheresis  
636 product.

637

638 Great efforts have been put into improving T cell manufacturing processes for better  
639 immunotherapy. For example, shortening the time frame of T cell expansion from  
640 around two weeks (Jacoby et al., 2019) to a few days (Ghassemi et al., 2018; Lu et al.,  
641 2016; Tu et al., 2019) or even without expansion in so called FasT CAR-T technology  
642 (Zhang et al., 2019). While more clinical data is required, both strategies have been  
643 proposed to maximally maintain the younger T cell subpopulations with enhanced  
644 engraftment and persistence. The use of homeostatic cytokine cocktails (e.g. IL-7/IL-  
645 15) (Surh and Sprent, 2008) or antigen-specific stimulation to maintain pools of less-  
646 differentiated T cells (e.g.  $T_{CM}/T_{SCM}$ ) (Cieri et al., 2013; Xu et al., 2014) has also been  
647 described. Additionally,  $CD4^+$  T or  $CD8^+$  T cells or  $CD8^+$   $T_{CM}$  subset can be magnetically  
648 pre-enriched and expanded separately in the presence of optimal cytokine cocktails,  
649 and co-transfusion of  $CD4^+$  T and  $CD8^+$  T cell products has seen preliminary success  
650 in both manufacturing and therapeutic studies (Gardner et al., 2017; Shah et al., 2020;  
651 Sommermeyer et al., 2016; Turtle et al., 2016).  $CD4^+$  T help is critical for optimal  $CD8^+$   
652 T expansion and early central memory pool maintenance in the absence of specific

653 cognate antigens (**Figures 6 and 7**). Hence, it will be of great interest to study how the  
654 pre-reconstituted CD4<sup>+</sup> T/CD8<sup>+</sup> T cells before expansion may further improve  
655 therapeutic efficacy when combined with the defined ratio of CD4/CD8 T cells for  
656 infusion. This would be more practically meaningful considering that patients with some  
657 tumors or chronic diseases tend to manifest a decreased ratio of CD4/CD8 T cells  
658 (Patel et al., 2016; Sommermeyer et al., 2016; You et al., 2009). On the other hand,  
659 rapid expansion method (REM), which requires large amount of non-dividing feeder  
660 cells such as irradiated allogeneic PBMC or antigen-bearing lymphoblastoid cell line  
661 (LCL), has been used to quickly obtain large numbers of therapeutic T cells (Jin et al.,  
662 2018; Wang and Riviere, 2015). Our findings would provide an alternative approach to  
663 achieve this without the use of additional feeder cells where only a proper ratio of CD4<sup>+</sup>  
664 T to CD8<sup>+</sup> T cells is adopted for co-expansion. Given these research progresses, our  
665 method can be flexibly adapted into those manufacturing workflows.

666

667 There are two main advantages for the technical feasibility of TRuST for the  
668 preparation of clinical grade T cell products. (1) The lack of expensive staining reagents  
669 can significantly reduce cost. By using only one laser (e.g. Blue laser 488 nm) for  
670 generating forward-scatter and side-scatter, data-processing burden during real-time  
671 sorting can also be simplified. (2) The successful application of good manufacturing  
672 practice (GMP)-compliant multiparameter flow cytometry systems in cell therapy  
673 (**Table S1**) (Bluestone et al., 2015; Fritsche et al., 2020) and advances in microfluidic  
674 systems enabling total lymphocytes enrichment immediately from whole blood in a

675 high-throughput approach by combining acoustic (Ding et al., 2013) and hydrodynamic  
676 focusing (Lissandrello et al., 2018; Urbansky et al., 2017). Thus, we envisage the  
677 versatility of side scatter-based lymphocytes analysis and reconstitution in these  
678 platforms.

679

## 680 **Limitations**

681 Despite the simplicity and ingenuity associated with TRuST, a limitation of this strategy  
682 is that it may not be feasible to discriminate differentiated lymphocyte subsets under  
683 fast expansion due to confounding effects from enlarged cell size. A possible solution  
684 could be the use of longer scattering wavelengths. Also, studies are required in future  
685 to test how efficient the SSC-based lymphocyte segregation is when using patient  
686 samples which usually manifest abnormal lymphocytes composition and activation  
687 statuses. We have demonstrated that it is of adequate sensitivity and pronounced  
688 usefulness to segregate the majority of naïve T cells from more-differentiated T cell  
689 subsets with controllable CD4/CD8 T cells ratio. We have also showed that, it is  
690 feasible to enhance the purification of specific lymphocyte subsets via computational  
691 gate design. Nevertheless, it would be more powerful for other applications such as  
692 label-free disease diagnosis and highly purified cell selection if the scattering resolution  
693 was further improved with interdisciplinary efforts. For example, use of microchannel-  
694 based fluidic systems and adoption of adjustable scattering angles (Rossi et al., 2019),  
695 inclusion of generic dyes (e.g. MitoTracker) measuring mitochondrial  
696 abundance/activity (Baron et al., 2019), or biomarkers possibly surrogating biophysical



697 properties (Tsai et al., 2020; Walsh et al., 2019) to improve lymphocyte subsets  
698 identification.

699

700 Overall, TRuST is a reliable and effective approach for optimum T cell reconstitution,  
701 that will be a significant improvement for current cell manufacturing methods. TRuST  
702 is also feasible for the selection of specific lymphocyte subsets for lymphocyte biology  
703 studies. This work has provided new insights into the intrinsic light-scattering attributes  
704 of different lymphocytes and will pave the way for the improvement and broad  
705 application of light property-relied cell identification and separation with  
706 interdisciplinary efforts.

707

#### 708 **SUPPLEMENTARY INFORMATION**

709 Supplementary information is available for this manuscript.

710

#### 711 **ACKNOWLEDGEMENTS**

712 This work was supported by funding from NUS Research Scholarship and Institute for  
713 Health Innovation and Technology (iHealthtech), NUS. The authors acknowledge  
714 technical support from the Flow Cytometry Laboratory (NUS Medical Sciences Cluster)  
715 for cell sorting.

716

#### 717 **AUTHOR CONTRIBUTIONS**

718 T.W and L.F.C conceived and designed the study. T.W performed the experiments and

719 data analysis with all other authors' assistance. T.W and L.F.C wrote the manuscript.

720 Y.H.L, Y.L, and H.J.W reviewed the manuscript and provided feedback. All authors

721 commented on the manuscript and approved the submission.

722

## 723 **DECLARATION OF INTERESTS**

724 The authors declare no competing interests.

725

## 726 **REFERENCES**

727 Alspach, E., Lussier, D.M., Miceli, A.P., Kizhvatov, I., DuPage, M., Luoma, A.M., Meng, W., Lichti,  
728 C.F., Esaulova, E., Vomund, A.N., *et al.* (2019). MHC-II neoantigens shape tumour immunity and  
729 response to immunotherapy. *Nature* 574, 696-701.

730 Arina, A., Karrison, T., Galka, E., Schreiber, K., Weichselbaum, R.R., and Schreiber, H. (2017). Transfer  
731 of Allogeneic CD4+ T Cells Rescues CD8+ T Cells in Anti-PD-L1-Resistant Tumors Leading to Tumor  
732 Eradication. *Cancer Immunol Res* 5, 127-136.

733 Attanasio, J., and Wherry, E.J. (2016). Costimulatory and Coinhibitory Receptor Pathways in Infectious  
734 Disease. *Immunity* 44, 1052-1068.

735 Baron, C.S., Barve, A., Muraro, M.J., van der Linden, R., Dharmadhikari, G., Lyubimova, A., de Koning,  
736 E.J.P., and van Oudenaarden, A. (2019). Cell Type Purification by Single-Cell Transcriptome-Trained  
737 Sorting. *Cell* 179, 527-542 e519.

738 Berger, C., Jensen, M.C., Lansdorp, P.M., Gough, M., Elliott, C., and Riddell, S.R. (2008). Adoptive  
739 transfer of effector CD8+ T cells derived from central memory cells establishes persistent T cell memory  
740 in primates. *J Clin Invest* 118, 294-305.

741 Bluestone, J.A., Buckner, J.H., Fitch, M., Gitelman, S.E., Gupta, S., Hellerstein, M.K., Herold, K.C.,  
742 Lares, A., Lee, M.R., Li, K., *et al.* (2015). Type 1 diabetes immunotherapy using polyclonal regulatory  
743 T cells. *Science translational medicine* 7, 315ra189-315ra189.

744 Bohler, T., von Au, M., Klose, N., Muller, K., Coulibaly, B., Nauwelaers, F., Spengler, H.P., Kynast-Wolf,  
745 G., and Krausslich, H.G. (2007). Evaluation of a simplified dual-platform flow cytometric method for  
746 measurement of lymphocyte subsets and T-cell maturation phenotypes in the population of Nouna,  
747 Burkina Faso. *Clinical and vaccine immunology : CVI* 14, 775-781.

748 Chen, L., and Flies, D.B. (2013). Molecular mechanisms of T cell co-stimulation and co-inhibition. *Nat*  
749 *Rev Immunol* 13, 227-242.

750 Cieri, N., Camisa, B., Cocchiarella, F., Forcato, M., Oliveira, G., Provasi, E., Bondanza, A., Bordignon,  
751 C., Peccatori, J., Ciceri, F., *et al.* (2013). IL-7 and IL-15 instruct the generation of human memory stem  
752 T cells from naive precursors. *Blood* 121, 573-584.

753 Clark, R.A., Shackelton, J.B., Watanabe, R., Calarese, A., Yamanaka, K., Campbell, J.J., Teague, J.E.,  
754 Kuo, H.P., Hijnen, D., and Kupper, T.S. (2011). High-scatter T cells: a reliable biomarker for malignant

755 T cells in cutaneous T-cell lymphoma. *Blood* *117*, 1966-1976.

756 Cook, K.D., and Whitmire, J.K. (2013). The depletion of NK cells prevents T cell exhaustion to  
757 efficiently control disseminating virus infection. *Journal of immunology* *190*, 641-649.

758 Cossarizza, A., Chang, H.-D., Radbruch, A., Acs, A., Adam, D., Adam-Klages, S., Agace, W.W.,  
759 Aghaepour, N., Akdis, M., Allez, M., *et al.* (2019). Guidelines for the use of flow cytometry and cell  
760 sorting in immunological studies (second edition). *European journal of immunology* *49*, 1457-1973.

761 Deng, Q., Han, G., Puebla-Osorio, N., Ma, M.C.J., Strati, P., Chasen, B., Dai, E., Dang, M., Jain, N.,  
762 Yang, H., *et al.* (2020). Characteristics of anti-CD19 CAR T cell infusion products associated with  
763 efficacy and toxicity in patients with large B cell lymphomas. *Nature medicine*.

764 Denton, A.E., Russ, B.E., Doherty, P.C., Rao, S., and Turner, S.J. (2011). Differentiation-dependent  
765 functional and epigenetic landscapes for cytokine genes in virus-specific CD8<sup>+</sup> T cells. *Proceedings of*  
766 *the National Academy of Sciences of the United States of America* *108*, 15306-15311.

767 Dimeloe, S., Mehling, M., Frick, C., Loeliger, J., Bantug, G.R., Sauder, U., Fischer, M., Belle, R.,  
768 Develioglu, L., Tay, S., *et al.* (2016). The Immune-Metabolic Basis of Effector Memory CD4<sup>+</sup> T Cell  
769 Function under Hypoxic Conditions. *J Immunol* *196*, 106-114.

770 Ding, X., Li, P., Lin, S.C., Stratton, Z.S., Nama, N., Guo, F., Slotcavage, D., Mao, X., Shi, J., Costanzo,  
771 F., *et al.* (2013). Surface acoustic wave microfluidics. *Lab on a chip* *13*, 3626-3649.

772 Finney, O.C., Brakke, H.M., Rawlings-Rhea, S., Hicks, R., Doolittle, D., Lopez, M., Futrell, R.B.,  
773 Orentas, R.J., Li, D., Gardner, R.A., *et al.* (2019). CD19 CAR T cell product and disease attributes predict  
774 leukemia remission durability. *J Clin Invest* *129*, 2123-2132.

775 Fraietta, J.A., Lacey, S.F., Orlando, E.J., Pruteanu-Malinici, I., Gohil, M., Lundh, S., Boesteanu, A.C.,  
776 Wang, Y., O'Connor, R.S., Hwang, W.T., *et al.* (2018). Determinants of response and resistance to CD19  
777 chimeric antigen receptor (CAR) T cell therapy of chronic lymphocytic leukemia. *Nature medicine* *24*,  
778 563-571.

779 Fritsche, E., Volk, H.D., Reinke, P., and Abou-El-Enin, M. (2020). Toward an Optimized Process for  
780 Clinical Manufacturing of CAR-Treg Cell Therapy. *Trends Biotechnol* *38*, 1099-1112.

781 Fuertes Marraco, S.A., Sonesson, C., Cagnon, L., Gannon, P.O., Allard, M., Abed Maillard, S., Montandon,  
782 N., Rufer, N., Waldvogel, S., Delorenzi, M., *et al.* (2015). Long-lasting stem cell-like memory CD8<sup>+</sup> T  
783 cells with a naive-like profile upon yellow fever vaccination. *Science translational medicine* *7*, 282ra248.

784 Gardner, R.A., Finney, O., Annesley, C., Brakke, H., Summers, C., Leger, K., Bleakley, M., Brown, C.,  
785 Mgebroff, S., Kelly-Spratt, K.S., *et al.* (2017). Intent-to-treat leukemia remission by CD19 CAR T cells  
786 of defined formulation and dose in children and young adults. *Blood* *129*, 3322-3331.

787 Gattinoni, L., Klebanoff, C.A., Palmer, D.C., Wrzesinski, C., Kerstann, K., Yu, Z., Finkelstein, S.E.,  
788 Theoret, M.R., Rosenberg, S.A., and Restifo, N.P. (2005). Acquisition of full effector function in vitro  
789 paradoxically impairs the in vivo antitumor efficacy of adoptively transferred CD8<sup>+</sup> T cells. *J Clin Invest*  
790 *115*, 1616-1626.

791 Gattinoni, L., Lugli, E., Ji, Y., Pos, Z., Paulos, C.M., Quigley, M.F., Almeida, J.R., Gostick, E., Yu, Z.,  
792 Carpenito, C., *et al.* (2011). A human memory T cell subset with stem cell-like properties. *Nature*  
793 *medicine* *17*, 1290-1297.

794 Ghassemi, S., Nunez-Cruz, S., O'Connor, R.S., Fraietta, J.A., Patel, P.R., Scholler, J., Barrett, D.M.,  
795 Lundh, S.M., Davis, M.M., Bedoya, F., *et al.* (2018). Reducing Ex Vivo Culture Improves the  
796 Antileukemic Activity of Chimeric Antigen Receptor (CAR) T Cells. *Cancer Immunol Res* *6*, 1100-1109.

797 Grutzkau, A., and Radbruch, A. (2010). Small but mighty: how the MACS-technology based on  
798 nanosized superparamagnetic particles has helped to analyze the immune system within the last 20 years.

- 799 Cytometry A 77, 643-647.
- 800 Hinrichs, C.S., Borman, Z.A., Cassard, L., Gattinoni, L., Spolski, R., Yu, Z., Sanchez-Perez, L., Muranski,  
801 P., Kern, S.J., Logun, C., *et al.* (2009). Adoptively transferred effector cells derived from naive rather  
802 than central memory CD8<sup>+</sup> T cells mediate superior antitumor immunity. *Proceedings of the National*  
803 *Academy of Sciences of the United States of America* 106, 17469-17474.
- 804 Hinrichs, C.S., Borman, Z.A., Gattinoni, L., Yu, Z., Burns, W.R., Huang, J., Klebanoff, C.A., Johnson,  
805 L.A., Kerkar, S.P., Yang, S., *et al.* (2011). Human effector CD8<sup>+</sup> T cells derived from naive rather than  
806 memory subsets possess superior traits for adoptive immunotherapy. *Blood* 117, 808-814.
- 807 Hu, W., Wang, G., Huang, D., Sui, M., and Xu, Y. (2019). Cancer Immunotherapy Based on Natural  
808 Killer Cells: Current Progress and New Opportunities. *Frontiers in immunology* 10, 1205.
- 809 Jacoby, E., Shahani, S.A., and Shah, N.N. (2019). Updates on CAR T-cell therapy in B-cell malignancies.  
810 *Immunol Rev* 290, 39-59.
- 811 Jin, J., Gkitsas, N., Fellowes, V.S., Ren, J., Feldman, S.A., Hinrichs, C.S., Stroncek, D.F., and Highfill,  
812 S.L. (2018). Enhanced clinical-scale manufacturing of TCR transduced T-cells using closed culture  
813 system modules. *Journal of translational medicine* 16, 13.
- 814 Klebanoff, C.A., Scott, C.D., Leonardi, A.J., Yamamoto, T.N., Cruz, A.C., Ouyang, C., Ramaswamy, M.,  
815 Roychoudhuri, R., Ji, Y., Eil, R.L., *et al.* (2016). Memory T cell-driven differentiation of naive cells  
816 impairs adoptive immunotherapy. *J Clin Invest* 126, 318-334.
- 817 Laghmouchi, A., Hoogstraten, C., Falkenburg, J.H.F., and Jedema, I. (2020). Long-term in vitro  
818 persistence of magnetic properties after magnetic bead-based cell separation of T cells. *Scand J Immunol*  
819 92, e12924.
- 820 Lissandrello, C., Dubay, R., Kotz, K.T., and Fiering, J. (2018). Purification of Lymphocytes by Acoustic  
821 Separation in Plastic Microchannels. *SLAS Technol* 23, 352-363.
- 822 Loudon, W.G., Abraham, S.R., Owen-Schaub, L.B., Hemingway, L.L., Hemstreet, G.P., and DeBault,  
823 L.E. (1988). Identification and selection of human lymphokine activated killer cell effectors and novel  
824 recycling intermediates by unique light-scattering properties. *Cancer Res* 48, 2184-2192.
- 825 Lu, T.L., Pugach, O., Somerville, R., Rosenberg, S.A., Kochenderfer, J.N., Better, M., and Feldman, S.A.  
826 (2016). A Rapid Cell Expansion Process for Production of Engineered Autologous CAR-T Cell Therapies.  
827 *Human gene therapy methods* 27, 209-218.
- 828 Majzner, R.G., and Mackall, C.L. (2019). Clinical lessons learned from the first leg of the CAR T cell  
829 journey. *Nature medicine* 25, 1341-1355.
- 830 Nakanishi, Y., Lu, B., Gerard, C., and Iwasaki, A. (2009). CD8(+) T lymphocyte mobilization to virus-  
831 infected tissue requires CD4(+) T-cell help. *Nature* 462, 510-513.
- 832 Ojaghi, A., Carrazana, G., Caruso, C., Abbas, A., Myers, D.R., Lam, W.A., and Robles, F.E. (2020).  
833 Label-free hematology analysis using deep-ultraviolet microscopy. *Proceedings of the National Academy*  
834 *of Sciences of the United States of America* 117, 14779-14789.
- 835 Patel, S., Jones, R.B., Nixon, D.F., and Bollard, C.M. (2016). T-cell therapies for HIV: Preclinical  
836 successes and current clinical strategies. *Cytotherapy* 18, 931-942.
- 837 Plouffe, B.D., Murthy, S.K., and Lewis, L.H. (2015). Fundamentals and application of magnetic particles  
838 in cell isolation and enrichment: a review. *Rep Prog Phys* 78, 016601.
- 839 Radtke, S., Pande, D., Cui, M., Perez, A.M., Chan, Y.-Y., Enstrom, M., Schmuck, S., Berger, A., Eunson,  
840 T., Adair, J.E., *et al.* (2019). Sort-purification of human CD34<sup>+</sup> CD90<sup>+</sup> cells reduces target cell  
841 population and improves lentiviral transduction. *bioRxiv*, 850479.
- 842 Rafiq, S., Hackett, C.S., and Brentjens, R.J. (2020). Engineering strategies to overcome the current

- 843 roadblocks in CAR T cell therapy. *Nature reviews Clinical oncology* *17*, 147-167.
- 844 Roddie, C., O'Reilly, M., Dias Alves Pinto, J., Vispute, K., and Lowdell, M. (2019). Manufacturing  
845 chimeric antigen receptor T cells: issues and challenges. *Cytotherapy* *21*, 327-340.
- 846 Rossi, D., Dannhauser, D., Telesco, M., Netti, P.A., and Causa, F. (2019). CD4+ versus CD8+ T-  
847 lymphocyte identification in an integrated microfluidic chip using light scattering and machine learning.  
848 *Lab on a chip* *19*, 3888-3898.
- 849 Ruban, G.I., Berdnik, V.V., Marinitch, D.V., Goncharova, N.V., and Loiko, V.A. (2010). Light scattering  
850 and morphology of the lymphocyte as applied to flow cytometry for distinguishing healthy and infected  
851 individuals. *J Biomed Opt* *15*, 057008.
- 852 Schietinger, A., Philip, M., Liu, R.B., Schreiber, K., and Schreiber, H. (2010). Bystander killing of cancer  
853 requires the cooperation of CD4(+) and CD8(+) T cells during the effector phase. *The Journal of*  
854 *experimental medicine* *207*, 2469-2477.
- 855 Seder, R.A., and Ahmed, R. (2003). Similarities and differences in CD4+ and CD8+ effector and memory  
856 T cell generation. *Nature immunology* *4*, 835-842.
- 857 Shah, N.N., Highfill, S.L., Shalabi, H., Yates, B., Jin, J., Wolters, P.L., Ombrello, A., Steinberg, S.M.,  
858 Martin, S., Delbrook, C., *et al.* (2020). CD4/CD8 T-Cell Selection Affects Chimeric Antigen Receptor  
859 (CAR) T-Cell Potency and Toxicity: Updated Results From a Phase I Anti-CD22 CAR T-Cell Trial. *J*  
860 *Clin Oncol* *38*, 1938-1950.
- 861 Sommermeyer, D., Hudecek, M., Kosasih, P.L., Gogishvili, T., Maloney, D.G., Turtle, C.J., and Riddell,  
862 S.R. (2016). Chimeric antigen receptor-modified T cells derived from defined CD8+ and CD4+ subsets  
863 confer superior antitumor reactivity in vivo. *Leukemia* *30*, 492-500.
- 864 Stuart, T., Butler, A., Hoffman, P., Hafemeister, C., Papalexi, E., Mauck, W.M., 3rd, Hao, Y., Stoeckius,  
865 M., Smibert, P., and Satija, R. (2019). Comprehensive Integration of Single-Cell Data. *Cell* *177*, 1888-  
866 1902 e1821.
- 867 Sun, J.C., Williams, M.A., and Bevan, M.J. (2004). CD4+ T cells are required for the maintenance, not  
868 programming, of memory CD8+ T cells after acute infection. *Nature immunology* *5*, 927-933.
- 869 Surh, C.D., and Sprent, J. (2008). Homeostasis of naive and memory T cells. *Immunity* *29*, 848-862.
- 870 Teeman, E., Shasha, C., Evans, J.E., and Krishnan, K.M. (2019). Intracellular dynamics of  
871 superparamagnetic iron oxide nanoparticles for magnetic particle imaging. *Nanoscale* *11*, 7771-7780.
- 872 Terstappen, L.W., de Grooth, B.G., Noltén, G.M., ten Napel, C.H., van Berkel, W., and Greve, J. (1986a).  
873 Physical discrimination between human T-lymphocyte subpopulations by means of light scattering,  
874 revealing two populations of T8-positive cells. *Cytometry* *7*, 178-183.
- 875 Terstappen, L.W., De Grooth, B.G., Ten Napel, C.H., Van Berkel, W., and Greve, J. (1986b).  
876 Discrimination of human cytotoxic lymphocytes from regulatory and B-lymphocytes by orthogonal light  
877 scattering. *J Immunol Methods* *95*, 211-216.
- 878 Terstappen, L.W., de Grooth, B.G., van Berkel, W., ten Napel, C.H., and Greve, J. (1988). Application of  
879 orthogonal light scattering for routine screening of lymphocyte samples. *Cytometry* *9*, 220-225.
- 880 Tsai, A.G., Glass, D.R., Juntilla, M., Hartmann, F.J., Oak, J.S., Fernandez-Pol, S., Ohgami, R.S., and  
881 Bendall, S.C. (2020). Multiplexed single-cell morphometry for hematopathology diagnostics. *Nat Med*  
882 *26*, 408-417.
- 883 Tu, S., Huang, R., Guo, Z., Deng, L., Song, C., Zhou, X., Yue, C., Zhang, L., He, Y., Yang, J., *et al.*  
884 (2019). Shortening the ex vivo culture of CD19-specific CAR T-cells retains potent efficacy against acute  
885 lymphoblastic leukemia without CAR T-cell-related encephalopathy syndrome or severe cytokine release  
886 syndrome. *American journal of hematology* *94*, E322-E325.

887 Turtle, C.J., Hanafi, L.A., Berger, C., Gooley, T.A., Cherian, S., Hudecek, M., Sommermeyer, D.,  
888 Melville, K., Pender, B., Budiarto, T.M., *et al.* (2016). CD19 CAR-T cells of defined CD4+:CD8+  
889 composition in adult B cell ALL patients. *J Clin Invest* *126*, 2123-2138.

890 Urbansky, A., Ohlsson, P., Lenshof, A., Garofalo, F., Scheduling, S., and Laurell, T. (2017). Rapid and  
891 effective enrichment of mononuclear cells from blood using acoustophoresis. *Sci Rep* *7*, 17161.

892 van Leeuwen, E.M., Gamadia, L.E., Baars, P.A., Remmerswaal, E.B., ten Berge, I.J., and van Lier, R.A.  
893 (2002). Proliferation requirements of cytomegalovirus-specific, effector-type human CD8+ T cells.  
894 *Journal of immunology* *169*, 5838-5843.

895 Waller, E.C., McKinney, N., Hicks, R., Carmichael, A.J., Sissons, J.G., and Wills, M.R. (2007).  
896 Differential costimulation through CD137 (4-1BB) restores proliferation of human virus-specific  
897 "effector memory" (CD28(-) CD45RA(HI)) CD8(+) T cells. *Blood* *110*, 4360-4366.

898 Walsh, A., Mueller, K., Jones, I., Walsh, C.M., Piscopo, N., Niemi, N.N., Pagliarini, D.J., Saha, K., and  
899 Skala, M.C. (2019). Label-free Method for Classification of T cell Activation. *bioRxiv*, 536813.

900 Wang, X., Berger, C., Wong, C.W., Forman, S.J., Riddell, S.R., and Jensen, M.C. (2011). Engraftment of  
901 human central memory-derived effector CD8+ T cells in immunodeficient mice. *Blood* *117*, 1888-1898.

902 Wang, X., and Riviere, I. (2015). Manufacture of tumor- and virus-specific T lymphocytes for adoptive  
903 cell therapies. *Cancer Gene Ther* *22*, 85-94.

904 Xu, Y., Zhang, M., Ramos, C.A., Durett, A., Liu, E., Dakhova, O., Liu, H., Creighton, C.J., Gee, A.P.,  
905 Heslop, H.E., *et al.* (2014). Closely related T-memory stem cells correlate with in vivo expansion of  
906 CAR.CD19-T cells and are preserved by IL-7 and IL-15. *Blood* *123*, 3750-3759.

907 You, J., Zhuang, L., Zhang, Y.F., Chen, H.Y., Sriplung, H., Geater, A., Chongsuvivatwong, V., Piratvisuth,  
908 T., McNeil, E., Yu, L., *et al.* (2009). Peripheral T-lymphocyte subpopulations in different clinical stages  
909 of chronic HBV infection correlate with HBV load. *World J Gastroenterol* *15*, 3382-3393.

910 Zeskind, B.J., Jordan, C.D., Timp, W., Trapani, L., Waller, G., Horodincu, V., Ehrlich, D.J., and  
911 Matsudaira, P. (2007). Nucleic acid and protein mass mapping by live-cell deep-ultraviolet microscopy.  
912 *Nat Methods* *4*, 567-569.

913 Zhang, C., He, J., Liu, L., Wang, J., Wang, S., Liu, L., Gao, L., Gao, L., Liu, Y., Kong, P., *et al.* (2019).  
914 CD19-Directed Fast CART Therapy for Relapsed/Refractory Acute Lymphoblastic Leukemia: From  
915 Bench to Bedside. *Blood* *134*, 1340-1340.

916 Zhang, C., Wang, Z., Yang, Z., Wang, M., Li, S., Li, Y., Zhang, R., Xiong, Z., Wei, Z., Shen, J., *et al.*  
917 (2017). Phase I Escalating-Dose Trial of CAR-T Therapy Targeting CEA(+) Metastatic Colorectal  
918 Cancers. *Mol Ther* *25*, 1248-1258.

919

## 920 **METHODS**

### 921 **Reagents**

922 Apheresis residual blood cones were collected from healthy adult donors from the  
923 Health Sciences Authority (HSA), Singapore, with approval from Institutional Review  
924 Board and informed consent from donors (NUS-IRB no. H-18-038E). Ficoll® Paque

925 Plus (GE Healthcare, 17-1440-02) was used for peripheral blood mononuclear cells  
926 (PBMC) enrichment. Cell culture medium RPMI1640 (Gibco, A1049101)  
927 supplemented with heat-inactivated fetal bovine serum (FBS) (Gibco, 10270106) was  
928 used for primary cell culture. In some experiments, anti-CD3/CD28 Dynabeads™  
929 (Gibco, 11161D) were used for T cell activation and expansion in the condition of  
930 human recombinant IL-2 (Gibco, PHC0021) or where indicated, human recombinant  
931 IL-7 plus IL-15. Phorbol ester (PMA) (Sigma-Aldrich, P8139) and ionomycin (Sigma-  
932 Aldrich, I9657) were used for cell stimulation to produce cytokines. Cytofix/Cytoperm™  
933 reagent kit (BD Biosciences, 554714) was used for cell fixation and permeabilization  
934 before intracellular staining. Flow cytometry antibodies used in this study are listed as  
935 follows. Antibodies from BD Biosciences include: CD3-BUV395 (Clone UCHT1; cat  
936 #563546), CD4-BV786 (Clone SK3; cat #563877) and CD8-PE-Cy7 (Clone SK1; cat  
937 #335787). Antibodies from Biolegend include: CD3-FITC (Clone UCHT1; cat #300406),  
938 CCR7-PE (Clone G043H7; cat #353204), CD45RA-APC (Clone HI100; cat #304112),  
939 CD45RO-Pacific Blue (Clone UCHL1; cat #304215), CD27-Pacific Blue (Clone M-T271;  
940 cat #356413), CD28-FITC (Clone CD28.2; cat #302906), CD95-FITC (Clone DX2; cat  
941 #305605), CD127-Brilliant Violet 785 (Clone A019D5; cat #351329), TIM-3-Pacific  
942 Blue (Clone F38-2E2; cat #345041), CD57-FITC (Clone HNK-1; cat #359603), LAG-  
943 3-Brilliant Violet 785 (Clone 11C3C65; cat #369321) and human TruStain FcX reagent  
944 (Cat #422302). Antibodies for intracellular staining include granzyme B-PE (BD  
945 Biosciences, GB11; cat #561142), IFN- $\gamma$ -FITC (Miltenyi Biotec, cat #130-090-433), IL-  
946 2-PE (Miltenyi Biotec, cat #130-090-487) and TNF- $\alpha$ -APC (Miltenyi Biotec, cat #130-

947 091-267).

948

#### 949 **PBMC isolation and usage**

950 PBMC were isolated from apheresis blood of healthy donors by density gradient  
951 centrifugation. To ensure batch-to-batch consistency, the enriched PBMC were  
952 counted and cryopreserved at 10 million cells/vial using liquid nitrogen and medium  
953 containing 90% FBS and 10% DMSO. For each experiment, the cells were recovered  
954 overnight in RPMI1640 supplemented with 10% FBS before downstream experiments.

955

#### 956 **T cell differentiation lineages and phenotypes characterization**

957 In this study, two gating methods were used to identify T cell differentiation lineages.  
958 For resting T cells, based on the expression level of canonical markers  
959 CCR7/CD45RA/CD45RO, they can be broadly classified as naïve ( $T_N$ ,  $CD45RA^{high}$   
960  $CCR7^{high}$   $CD45RO^{-}$ ), central memory ( $T_{CM}$ ,  $CD45RA^{dim/-}$   $CCR7^{low}$ ), effector memory ( $T_{EM}$ ,  
961  $CD45RA^{dim/-}$   $CCR7^{-}$ ) and terminally differentiated effector ( $T_{EMRA}$ ,  $CD45RA^{high}$   $CCR7^{-}$ )  
962 (Bohler et al., 2007; Seder and Ahmed, 2003). For T cells undergoing activation and  
963 proliferation, an in-depth gating strategy was adapted where the  $T_{CM}$  is further  
964 dissected into naïve phenotype-closest  $CD45RA^{high}$   $T_{CM}$  ( $T_{CMRA-hi}$ ), memory phenotype-  
965 closest  $CD45RA^{low}$   $T_{CM}$  ( $T_{CMRA-low}$ ) and  $CD45RA^{-}$   $T_{CM}$  ( $T_{CMO}$ ), while  $T_{EM}$  with  $CD45RA$   
966 expression is classified into  $CD45RA^{low}$   $T_{EM}$  ( $T_{EMRA-low}$ ) and  $CD45RA^{high}$   $T_{EM}$  ( $T_{EMRA-hi}$ ).

967

968 To better understand the T cell dynamic changes in their activation/senescent statuses



969 either before or during expansion, the expression profile of a panel of selected cell  
970 surface markers was longitudinally assessed, and it includes classical naïve/memory  
971 markers CCR7/CD45RA/CD45RO, proliferation and survival-enhancing costimulatory  
972 receptors CD27/CD28, and immune activation/inhibition markers  
973 CD127/CD95/CD57/LAG-3/TIM-3. To mitigate compensation-induced mutual signaling  
974 interferences in multiparameter flow cytometry, the staining panels were designed as  
975 follows: panel for dynamic change of naïve/memory composition (CD3-FITC/CD4-  
976 BV786/CD8-PE-Cy7/CCR7-PE/CD45RA-APC/CD45RO-V450), panel for co-  
977 expression of co-stimulatory markers in naïve/memory subsets (CD3-BUV395/CD8-  
978 PE.Cy7/CCR7-PE/CD45RA-APC/CD27-Pacific Blue/CD28-FITC), two panels were  
979 designed for immune activation/inhibition markers profiling in naïve/memory T cell  
980 subsets (CD3-BUV395/CD8-PE-Cy7/CCR7-PE/CD45RA-APC/CD45RO-Pacific Blue  
981 /CD95-FITC/CD127-BV785, or CD3-BUV395/CD8-PE-Cy7/CCR7-PE/CD45RA-APC  
982 /TIM-3-Pacific Blue/CD57-FITC/LAG-3-BV785). Pre-blocking step with TruStain FcX  
983 (BioLegend) was included for all staining. For some experiments where significant  
984 dead cells may be generated such as the first 2-3 days post T cell activation and PMA-  
985 based stimulation, LIVE/DEAD viability dye (Invitrogen, L34963) was used to exclude  
986 dead cells. CD3-FITC, CD4-BV786, and CD8-PE-Cy7 were from BD Biosciences. All  
987 other antibodies used were purchased from BioLegend. Flow cytometry compensation  
988 matrices and sample data acquisition were completed in CytoFLEX analyzer  
989 (Beckman Coulter) and analyzed by FlowJo software version 10.

990

991 **Light-scattering distribution of lymphocytes**

992 To obtain the light-scattering profile of main lymphocyte populations and  
993 subpopulations, PBMC were rested overnight, and stained with CD3-BUV395/CD4-  
994 BV786/CD8-PE-Cy7 for T cell population identification, or CD3-BUV395/CD56-  
995 BV786/CD19-FITC for NK and B cell identification, or CD3-BUV395/CD4-BV786/CD8-  
996 PE-Cy7/CCR7-PE/CD45RA-APC for naïve/memory T cells characterization. After  
997 washing, the cells were re-suspended in cold PBS before flow cytometry data  
998 acquisition. For a label-free approach, the cells were washed twice in cold phosphate  
999 buffer (PBS) before suspended in cold PBS and sorted on Moflo Astrios (Beckman  
1000 Coulter). Sorted cells with different scattering intensity were stained to identify the  
1001 percentages of CD3<sup>+</sup> CD4<sup>+</sup> T/CD3<sup>+</sup> CD8<sup>+</sup> T, NK/B cell, or T<sub>N</sub>/T<sub>CM</sub>/T<sub>EM</sub>/T<sub>EMRA</sub>. Where  
1002 indicated, a panel of selected surface markers was included to probe the detailed  
1003 activation/senescent phenotypes of sorted cell populations, including CD45RO, CD27,  
1004 CD28, CD127, CD95, CD57, LAG-3 and TIM-3. The scattering plots were generated  
1005 by FlowJo software.

1006

1007 **Lymphocytes enrichment by automatic gating search**

1008 Computational gating search (GateID) (Baron et al., 2019) was used to find the gate  
1009 for optional cell type enrichment from a mixed cell population. Briefly, PBMC were  
1010 recovered overnight and stained with different antibody panels for T cell identification  
1011 (CD3-BUV395/CD4-BV786/CD8-PE-Cy7), NK/B cells identification (CD3-  
1012 BUV395/CD56-BV786/CD19-FITC), or naïve/memory T cells characterization (CD3-

1013 BUV395/CD4-BV786/CD8-PE-Cy7/CCR7-PE/CD45RA-APC). After washing, flow  
1014 cytometry data was acquired in CytoFLEX analyzer (Beckman Coulter). The raw  
1015 readouts corresponding to FSC and SSC parameters for each cell type were exported  
1016 and input into the GateID package. The yield for each desired cell type (e.g. CD4<sup>+</sup>  
1017 T/CD8<sup>+</sup> T/NK/B/T<sub>N</sub>/T<sub>CM</sub>/T<sub>EM</sub>/T<sub>EMRA</sub>) was set to 5% - 100 % and gating vertices were  
1018 constantly set to 4. The yield is the count percentage of target cell type within the gating  
1019 to that of the whole cell population, while the purity indicates the proportion of target  
1020 cell type to total cell numbers within each gate corresponding to desired yield.

1021

## 1022 **Cell sorting**

1023 For light-scatter based label-free cell sorting from resting PBMC, cryopreserved PBMC  
1024 were recovered overnight in RPMI1640 supplemented with 10% FBS and washed in  
1025 cold phosphate buffer (PBS) before suspended in cold PBS and sorted on Moflo  
1026 Astrios (Beckman Coulter). The excitation wavelength for the generation of side-  
1027 scatter (488/6-nm filter) and forward-scatter (488/6-nm filter) was 488 nm. Where  
1028 indicated, a combined excitation by 488 nm and 405 nm was adopted to sort  
1029 lymphocytes of different side-scatter (488/6-nm and 405/10-nm filter). Side-scatter was  
1030 measured at an orthogonal angle from the light beam propagation axis while forward-  
1031 scatter was measured anti-parallel to the incident beam. To make batch-to-batch  
1032 experiments comparable, the sorting gate was set to equally sort cell populations of  
1033 different light intensity (SSC<sup>high</sup>/SSC<sup>low</sup> or FSC<sup>high</sup>/FSC<sup>low</sup>). For antibody staining-based  
1034 cell sorting, PBMC were pre-blocked with TruStain FcX and stained with CD4-BV786

1035 (BD Biosciences) and CD8-PE-Cy7 (BD Biosciences) for sequential sorting of CD4<sup>+</sup>  
1036 cells and CD8<sup>+</sup> cells on Moflo Astrios. It is important to note that only the cells with the  
1037 high expression of CD8 were sorted as CD8<sup>+</sup> T cells because there were some NK  
1038 cells that also expressed diminished CD8. Also, anti-CD3 was not used for cell sorting  
1039 experiments where the sorted cells would be subjected to CD3/CD28-engaged  
1040 stimulation. The sorted cells were validated to achieve enough purity of CD3<sup>+</sup> CD4<sup>+</sup> T  
1041 or CD3<sup>+</sup> CD8<sup>+</sup> T cells (> 97%) before reconstituted for co-culture assay.

1042

#### 1043 **Cell stimulation and expansion in vitro**

1044 Sorted SSC<sup>low</sup> and SSC<sup>high</sup> cells were either expanded alone or reconstituted at a ratio  
1045 of 1:1 (equal to total lymphocytes within initial cell sample) for co-expansion. The  
1046 starting cell numbers for each condition were 0.08 million/well in 96-well plate. After 1-  
1047 hour incubation at 37°C, all cell groups were activated by CD3/CD28 engagement at  
1048 anti-CD3/CD28 microbeads to cells ratio 3:1 and 5 ng/ml IL-2. Similarly, the sorted  
1049 CD4<sup>+</sup> T cells and CD8<sup>+</sup> T cells were reconstituted at indicated ratios to achieve 0.06  
1050 million/well. The ratio of anti-CD3/CD28 microbeads to cells was 3:1 and 5 ng/ml of IL-  
1051 2 was supplemented. Half of the culture medium was replaced with fresh medium  
1052 containing 5 ng/ml IL-2 every two days during initial activation/expansion stages (day  
1053 3 to day 7) and daily during late expansion phases (day 7 to day 11). During the  
1054 expansion course, the cell numbers in each group were counted by trypan blue  
1055 exclusion and aliquoted into approximately 0.1 million/well for all groups to mitigate  
1056 high cell concentration. Data collection included manual counting of total nucleated

1057 cells (TNC), flow cytometry detection of CD4/CD8 T cells, effector/memory  
1058 composition, and effectors expression (e.g. cytokines and granzyme B) at indicated  
1059 time points post activation.

1060

1061 Around 5 million expanded T cells at day 11 for each condition were cryopreserved for  
1062 future usage. In some experiments where cell responsiveness to second stimulation  
1063 was tested by CD3/CD28 engagement, the pre-expanded T cells at day 11 derived  
1064 from different SSC groups were thawed and incubated at 37°C overnight. 0.06 million  
1065 cells were seeded into each well of a 96-well plate and re-stimulated by anti-CD3/CD28  
1066 microbeads at beads to cell ratio of 1:1 under 5 ng/ml IL-2 or 5 ng/ml IL-7 and 5 ng/ml  
1067 IL-15. Total cell numbers were recorded by manual counting and split into  
1068 approximately 0.1 million/well to minimize high cell concentration. To assess the ability  
1069 of CD4<sup>+</sup> T cells to rescue the proliferation capability of extensively pre-expanded CD8<sup>+</sup>  
1070 T cells, cell materials derived from SSC<sup>high</sup> group (day 13) which was enriched in large  
1071 numbers of terminally differentiated CD8<sup>+</sup> T cells were labelled with CellTrace Far Red  
1072 (Invitrogen, C34564) following the manufacturer protocol. The labelled T cells and  
1073 sorted resting CD4<sup>+</sup> T cells of the same donor were reconstituted at indicated ratios  
1074 and activated by anti-CD3/CD28 microbeads supplemented with 5 ng/ml IL-2. After 4  
1075 days, total cell numbers were counted and stained with CD4-BV786 before analysis  
1076 on flow cytometer to determine CD8<sup>+</sup> T cells proliferation.

1077

1078 **Functionality in effecting factors expression**

1079 To determine the immune response of T cells in cytokine and granzyme B expression,  
1080 residual anti-CD3/CD28 microbeads were removed from expanded T cells at day 7 or  
1081 day 11 before being re-stimulated in the presence or absence of 50 ng/ml PMA and 1  
1082 µg/ml ionomycin for an additional 2.5 hours. Cells were collected and labelled with  
1083 LIVE/DEAD viability dye before further blocking with TruStain FcX. Surface markers  
1084 CD3-BUV395 and CD8-PE-Cy7 were used to characterize T cell populations. After  
1085 fixation/permeabilization treatment, each sample was divided into two tubes for either  
1086 cytokine detection with IFN-γ-FITC (Miltenyi Biotec), IL-2-PE (Miltenyi Biotec) and  
1087 TNF-α-APC (Miltenyi Biotec) or granzyme B measurement with granzyme B-PE (BD  
1088 Biosciences) where isotype control antibodies were properly included. Flow cytometry  
1089 data were acquired in CytoFLEX analyzer (Beckman Coulter) and analyzed by FlowJo  
1090 software. Notably, the CD4 marker has a substantial downregulation post PMA  
1091 stimulation, thus the CD3<sup>+</sup> CD8<sup>-</sup> T cells were gated as CD3<sup>+</sup>CD4<sup>+</sup> T cells instead for  
1092 data presentation.

1093

#### 1094 **Migration assay**

1095 *In vitro* chemotactic migration was used to evaluate the cells lymphnode-homing  
1096 capacity. Briefly, CCL19 (300 ng/ml) and CCL21 (300 ng/ml) (PeproTech) in 100 µl  
1097 culture medium were added to the lower chamber of 96-well transwell plate (5 µm  
1098 porosity) (Corning, CLS3388). For control group, only culture medium without  
1099 chemokines was added. 0.1 million expanded T cells (day 11) derived from SSC<sup>high</sup>,  
1100 SSC<sup>low</sup> and reconstituted SSC<sup>high+low</sup> groups, or from experiments using CD4<sup>+</sup> T-CD8<sup>+</sup>

1101 T co-culture were seeded into the upper chamber in 80  $\mu$ l culture medium. Each  
1102 condition was conducted in duplicates. After five hours, the numbers of cells migrating  
1103 to the lower chamber were counted by trypan blue exclusion. For migration capacity,  
1104 the counts subtracted from the migrated cell numbers in control group were presented,  
1105 correspondingly.

1106

### 1107 **Principal component analysis**

1108 For each cell sample derived from sorted  $SSC^{high}$ ,  $SSC^{low}$  or reconstituted  $SSC^{high+low}$   
1109 population, the cell composition ( $T_N$ ,  $T_{CMRA-hi}$ ,  $T_{CMRA-low}$ ,  $T_{CMRA-low}$ ,  $T_{CMO}$ ,  $T_{EM}$ ,  $T_{EMRA-hi}$ ,  
1110 and  $T_{EMRA-low}$ ) and multifunctional cytokine expression profile ( $IFN-\gamma^+$  only,  $IL-2^+$  only,  
1111  $TNF-\alpha^+$  only,  $IFN-\gamma^+ IL-2^+$ ,  $IFN-\gamma^+ TNF-\alpha^+$ ,  $IL-2^+ TNF-\alpha^+$ , and  $IFN-\gamma^+ IL-2^+ TNF-\alpha^+$ ) were  
1112 integrated together for PCA calculation using the program embedded in Seurat  
1113 package (Stuart et al., 2019). For PCA plotting, the same cell subsets from all groups  
1114 with percentage less than 4% were omitted. The data for day 7 and day 11 were  
1115 calculated separately. For data at day 7, the  $IFN-\gamma^+ IL-2^+/IFN-\gamma^+ TNF-\alpha^+/IFN-\gamma^+ IL-2^+$   
1116  $TNF-\alpha^+$  were combined as “ $IFN^+$  Multi” due to relatively lower percentage of these cells  
1117 in some donors expressing double positive cytokines.

1118

### 1119 **Statistical methods**

1120 All values with error bars are reported as mean  $\pm$  SEM. Statistical analysis was  
1121 performed using GraphPad Prism. Unpaired two-tailed *t*-test was used to evaluate  
1122 statistical significances between two groups. Where indicated, paired two-tailed *t*-test

1123 was used to compare the differences between two groups that combined data of  
1124 different donors together.

1125

1126 **DATA AND CODE AVAILABILITY**

1127 The data that support the findings of this study can be made available by the  
1128 corresponding author. There is no customized code for this work. The set of adjustable  
1129 parameters in GateID program has been indicated in the Methods section.

1130

1131
